# **DISENTANGLING SIGNATURES OF SELECTION BEFORE AND AFTER EUROPEAN COLONIZATION IN LATIN AMERICANS**

Javier Mendoza-Revilla<sup>1,2,\*</sup>, Juan Camilo Chacón-Duque<sup>3</sup>, Macarena Fuentes-Guajardo<sup>4</sup>, Louise Ormond<sup>1</sup>, Ke Wang<sup>5</sup>, Malena Hurtado<sup>2</sup>, Valeria Villegas<sup>2</sup>, Vanessa Granja<sup>2</sup>, Victor Acuña-Alonzo<sup>6</sup>, Claudia Jaramillo<sup>7</sup>, William Arias<sup>7</sup>, Rodrigo Barquera Lozano<sup>5,6</sup>, Jorge Gómez-Valdés<sup>6</sup>, Hugo Villamil-Ramírez<sup>8,9</sup>, Caio C. Silva de Cerqueira<sup>10</sup>, Keyla M. Badillo Rivera<sup>11</sup>, Maria A. Nieves-Colón<sup>12</sup>, Christopher R. Gignoux<sup>13</sup>, Genevieve L. Wojcik<sup>14</sup>, Andrés Moreno-Estrada<sup>15</sup>, Tábita Hunemeier<sup>10</sup>, Virginia Ramallo<sup>10,16</sup>, Lavinia Schuler-Faccini<sup>10</sup>, Rolando Gonzalez-José<sup>16</sup>, Maria-Cátira Bortolini<sup>10</sup>, Samuel Canizales-Quinteros<sup>8,9</sup>, Carla Gallo<sup>2</sup>, Giovanni Poletti<sup>2</sup>, Gabriel Bedoya<sup>7</sup>, Francisco Rothhammer<sup>4,17</sup>, David Balding<sup>1,18</sup>, Matteo Fumagalli<sup>19</sup>, Kaustubh Adhikari<sup>20</sup>, Andrés Ruiz-Linares<sup>1,21,22\*¶</sup> and Garrett Hellenthal<sup>1\*¶</sup>

<sup>1</sup> Department of Genetics, Evolution and Environment, and UCL Genetics Institute, University College London, London, UK

<sup>2</sup> Laboratorios de Investigación y Desarrollo, Facultad de Ciencias y Filosofía, Universidad Peruana Cayetano Heredia, Lima, Perú

<sup>3</sup> Centre for Palaeogenetics & Department of Archaeology and Classical Studies, Stockholm University, Stockholm, Sweden

<sup>4</sup> Departamento de Tecnología Médica, Facultad de Ciencias de la Salud, Universidad de Tarapacá, Arica, Chile.

<sup>5</sup> Department of Archaeogenetics, Max Planck Institute for the Science of Human History, Jena, Germany

<sup>6</sup> National Institute of Anthropology and History, Mexico City, Mexico

<sup>7</sup> GENMOL (Genética Molecular), Universidad de Antioquia, Medellín, Colombia

<sup>8</sup> Unidad de Genómica de Poblaciones Aplicada a la Salud, Facultad de Química, UNAM-Instituto Nacional de Medicina Genómica, Mexico City, Mexico

<sup>9</sup> Universidad Nacional Autónoma de México e Instituto Nacional de Medicina Genómica, Mexico City, Mexico

<sup>10</sup> Departamento de Genética, Universidade Federal do Rio Grande do Sul, Porto Alegre, Brazil

<sup>11</sup> Department of Genetics, Stanford School of Medicine, Stanford, California, United States

<sup>12</sup> Department of Anthropology, University of Minnesota Twin Cities, Minneapolis, Minnesota, United States

<sup>13</sup> University of Colorado Anschutz Medical Campus, Aurora, Colorado, United States

<sup>14</sup> Bloomberg School of Public Health, Johns Hopkins University, Baltimore, Maryland, United States

<sup>15</sup> Laboratorio Nacional de Genómica para la Biodiversidad (UGA-LANGEBIO), CINVESTAV, Irapuato, Guanajuato, Mexico

<sup>16</sup> Instituto Patagónico de Ciencias Sociales y Humanas-Centro Nacional Patagónico, CONICET, Puerto Madryn, Argentina

<sup>17</sup> Programa de Genética Humana, ICBM, Facultad de Medicina, Universidad de Chile, Santiago, Chile

<sup>18</sup> Schools of BioSciences and Mathematics & Statistics, University of Melbourne, Melbourne, Australia

<sup>19</sup> Department of Life Sciences, Silwood Park campus, Imperial College London, Ascot, UK

<sup>20</sup> School of Mathematics and Statistics, Faculty of Science, Technology, Engineering and Mathematics, The Open University, Milton Keynes, UK

<sup>21</sup> Ministry of Education Key Laboratory of Contemporary Anthropology and Collaborative Innovation Center of Genetics and Development, Fudan University, Shanghai, China

<sup>22</sup> Aix-Marseille Université, CNRS, EFS, ADES, Marseille, France

<sup>¶</sup> Current address: Human Evolutionary Genetics Unit, Institut Pasteur, UMR2000, CNRS, Paris, France.

53 ¶These authors jointly supervised this work

54 \*Correspondence to: javier.mendoza-revilla@pasteur.fr (J.M.R); andresruiz@fudan.edu.cn  
55 (A.R.L.); g.hellenthal@ucl.ac.uk (G.H.)

56

# **Abstract**

Throughout human evolutionary history, large-scale migrations have led to intermixing (i.e., admixture) between previously separated human groups. While classical and recent work have shown that studying admixture can yield novel historical insights, the extent to which this process contributed to adaptation remains underexplored. Here, we introduce a novel statistical model, specific to admixed populations, that identifies loci under selection while determining whether the selection likely occurred post-admixture or prior to admixture in one of the ancestral source populations. Through extensive simulations we show that this method is able to detect selection, even in recently formed admixed populations, and to accurately differentiate between selection occurring in the ancestral or admixed population. We apply this method to genome-wide SNP data of ~4,000 individuals in five admixed Latin American cohorts from Brazil, Chile, Colombia, Mexico and Peru. Our approach replicates previous reports of selection in the HLA region that are consistent with selection post-admixture. We also report novel signals of selection in genomic regions spanning 47 genes, reinforcing many of these signals with an alternative, commonly-used local-ancestry-inference approach. These signals include several genes involved in immunity, which may reflect responses to endemic pathogens of the Americas and to the challenge of infectious disease brought by European contact. In addition, some of the strongest signals inferred to be under selection in the Native American ancestral groups of modern Latin Americans overlap with genes implicated in energy metabolism phenotypes, plausibly reflecting adaptations to novel dietary sources available in the Americas.

## Introduction

Admixed populations offer a unique opportunity to detect recent selection. In the human lineage, genomic studies have demonstrated the pervasiveness of admixture events in the history of the vast majority of human populations (Patterson et al. 2012; Hellenthal et al. 2014; Lazaridis et al. 2014). By inferring the ancestral origins of particular genetic loci in the genomes of recently admixed individuals, recent studies have provided evidence that such admixture has facilitated the spread of adaptative genetic mutations in humans. Notable examples include the transfer of a protective allele in the Duffy blood group gene likely providing resistance to *Plasmodium vivax* malaria in Malagasy and Cape Verdeans from sub-Saharan Africans (Hodgson et al. 2014; Pierron et al. 2018; Hamid et al. 2021), and the transmission of the lactase persistence allele in the Fula pastoralists from Western Eurasians (Vicente et al. 2019).

An ideal setting in which to test whether and how admixture contributed to genetic adaptation is Latin America. The genetic make-up of present day Latin Americans stems mainly from three ancestral populations: indigenous Native Americans, Europeans (mainly from the Iberian Peninsula), and Sub-Saharan Africans (Wang et al. 2007; Moreno-Estrada et al. 2013; Moreno-Estrada et al. 2014; Homburger et al. 2015; Chacon-Duque et al. 2018; Luisi et al. 2020) that were brought together starting ~500 years ago. The admixed genomes of Latin Americans are thus the result of an intermixing process between human populations that had been evolving independently for tens-of-thousands of years and that were suddenly brought together in a new environment. In this new environment, the ancestral genomes were quickly subjected to novel pressures that were largely unfamiliar from where they firstly evolved. Therefore, the genomes of Latin Americans potentially harbor signals of both older adaptations present in each of the ancestral populations, and more recent adaptations attributable to beneficial variants, e.g. introduced from a particular ancestral population, increasing rapidly in frequency post-admixture. Motivated by this, several studies have explored the genomes of admixed Latin Americans for signatures of selection, for example focusing on events occurring since the admixture event (Tang et al. 2007; Basu et al. 2008; Ettinger et al. 2009; Guan 2014; Rishishwar et al. 2015; Deng et al. 2016; Zhou et al. 2016; Norris et al. 2020; Vicuna et al. 2020). These studies have relied on an approach similar to that of admixture mapping, where the ancestry of a genomic region in each admixed individual is assigned to a particular ancestral population, a technique known as local-ancestry-inference (LAI). Loci with significantly more inferred ancestry inherited from one ancestral population are assumed to have evolved under some form of selection (Tang et al. 2007).

In addition, the genetic make-up of Latin Americans offers the opportunity to detect selection in their ancestral populations, as large cohorts of Latin Americans can be leveraged to reconstruct genetic variation patterns in each source population. This is of particular use for exploring selection in Native Americans, since Native groups are currently underrepresented in genomic studies (Sirugo et al. 2019) and as a consequence only a few studies have centered on detecting adaptive signals of indigenous groups from the Americas. Such studies have identified strong selective signals at different genes, particularly at those related to immunity, highlighting the selective pressures that Native Americans were subjected to after they entered the continent (Lindo et al. 2018; Reynolds et al. 2019; Avila-Arcos et al. 2020).

With some exceptions (Cheng et al. 2021), these studies either limited their analyses to Latin Americans with high Native American ancestry or used LAI to infer loci in individuals that derive from a Native American source. However, such approaches may result in a reduction of statistical power due to removal of individuals with non-Native ancestry, inaccurate local ancestry estimation and/or through removing segments challenging to assign.

Here we present a novel statistical model that identifies loci that have undergone selection before or after an admixture event (which we refer to as pre- or post-admixture selection, respectively). In contrast to previous methods, this approach is based on allele frequencies and does not require assignments of local ancestry along the genome. We illustrate the utility of our new method by performing a selection scan in five Latin American cohorts collected as part from the CANDELA Consortium (Ruiz-Linares et al. 2014). Our results suggest that several loci have been subjected to natural selection in admixed Latin American populations, and in their ancestral populations, replicating many of these signals using LAI. Many of the putative selected SNPs are strongly associated to relevant phenotypes, or act as expression quantitative loci (eQTL) in relevant tissues, providing further evidence of their functional effect. Overall, our analyses highlight the usefulness of our method to detect signals of selection in admixed populations or their ancestral populations, and reveal novel candidate genes implicated in the adaptive history of groups from the American continent.

## Results

### *Overview of AdaptMix*

In part following Balding and Nichols (1995), and analogous to previous approaches (Long 1991; Mathieson et al. 2015; Cheng et al. 2021), our model AdaptMix assumes that, under neutrality, the

allele frequencies of an admixed target population can be described using a beta-binomial model, with expected allele frequency equal to a mixture of sampled allele frequencies from a set of groups that act as surrogates to the admixing sources (fig. 1). In our case the admixed target population is a Latin American cohort, defined below, and we use three surrogate groups to represent Native American, European, and African admixing source populations. The mixture values are inferred a priori, e.g. using ADMIXTURE (Alexander et al. 2009) (fig. 1a) or SOURCEFIND (Chacon-Duque et al. 2018), as the average amount of ancestry that each admixed target individual matches to a set of reference populations. (The reference populations used by these programs may be the same as the surrogate populations, but they need not be as illustrated below.) We find the variance parameter that maximises the likelihood of this beta-binomial model across all SNPs. This variance term aims to limit the number of false-positives attributable to genetic drift in the target population following admixture and/or the use of inaccurate surrogates for the ancestral populations. Then, at each SNP, we calculate the probability of observing allele counts equal to or more extreme than those observed in the target population, hence providing a *P*-value testing the null hypothesis that the SNP is neutral (see Methods).

Assuming a pulse of admixture, this test is designed to detect selection occurring: (i) in the admixed population following the admixture event (e.g. along the purple line time period in fig. 1b), and/or (ii) in one (or more) of the source/surrogate pairings, i.e. following the split of the surrogate population from the admixing source it is representing (e.g. along the red and/or blue lines in fig. 1b). At SNPs with evidence of selection (i.e. low *P*-values), we distinguish between (i) and (ii) by exploring how genotype counts of admixed target individuals relate to their inferred admixture proportions contributed by each surrogate. Under scenario (i), we assume that selection affects all target individuals equally, regardless of their admixture proportions, which in turn assumes all ancestries were present when selection occurred. In contrast, under scenario (ii), we expect selection to more strongly affect one of the source/surrogate population pairings. Intuitively, if (ii) is true, individuals with nearly 100% ancestry from the source/surrogate pair experiencing selection will have genotype counts that deviate the most from expectations under the neutral model, while individuals with nearly 0% ancestry from this pair will have counts that closely follow the neutral model (fig. 1c). If instead (i) is true, this pattern is attenuated, though it can be challenging in practice to distinguish (ii) from (i) if allele frequencies strongly differ between surrogate groups (fig. 1d). Assuming a multiplicative model of selection, we find the selection coefficients that maximize the fit of the data to model (i) and to model (ii) when separately treating each source/surrogate pair as the selected group. We report ratios of likelihoods, equivalent here to using differences in Akaike Information Criterion (AIC), to quantify our ability to distinguish among scenarios (i) and (ii).

188

189 In summary, for each tested SNP we infer (a) a  $P$ -value testing the null hypothesis of neutrality, (b)  
190 the relative evidence (i.e. likelihood ratios) for whether selection occurred post-admixture or in one  
191 of the admixing sources and (c) the selection strength summed across time.

192

### 193 ***Simulations***

194 We tested our approach using simulations designed to resemble our Latin American cohort in terms  
195 of sample size, inferred admixture proportions, and the extent to which our surrogates match the  
196 true admixing sources (see Methods). At a false-positive rate of  $5 \times 10^{-5}$ , these simulations indicate  
197 we have ~50-90% power to detect selection for scenario (i) (i.e., post-admixture selection) with  
198 selection strength ( $s$ ) of 1.15-1.20 per generation in homozygotes carrying two copies of the  
199 selected allele, and selection occurring over 12 generations under various modes of selection  
200 (additive, dominant, multiplicative, recessive) (fig. 2a, supplementary fig. S1). For scenario (ii), in  
201 the case of selection occurring in the Native American source, power depends on the overall amount  
202 of Native American ancestry (fig. 2a). As an example, Brazil-like simulations (<15% average  
203 Native American ancestry) show little power, Colombia-like simulations (~30% average Native  
204 American ancestry) typically exhibit >50% power, and other simulated populations (~50–70%  
205 average Native American ancestry) exhibit >75% power under scenario (ii) assuming  $s=1.1$  per  
206 generation over 50 generations, with similar power if instead  $s \sim 1.025$  over 150 generations  
207 (supplementary fig S2). Detecting selection occurring in the European source depends on the  
208 overall amount of European ancestry in a similar manner (e.g., fig. 2a, supplementary fig. S3). For  
209 SNPs where we detect selection, we mis-classify the type of selection  $\leq 2\%$  of the time, e.g.,  
210 concluding post-admixture selection when the truth is selection in the Native American source ~1%  
211 of the time across all selection coefficients (fig. 2b). However, our approach often fails to classify  
212 selection scenarios unless selection strengths are large (e.g.,  $s > 1.1$ ).

213

### 214 ***Applying AdaptMix to the five Latin American cohorts of CANDELA***

215 We divided Latin Americans into five cohorts based on country of origin: Brazil ( $n=190$ ), Chile  
216 ( $n=896$ ), Colombia ( $n=1125$ ) Mexico ( $n=773$ ), and Peru ( $n=834$ ), using individuals sampled as part  
217 of the CANDELA Consortium (Ruiz-Linares et al. 2014), testing each cohort for selection  
218 separately (supplementary fig. S4). Analyzing each cohort by country of origin results in a higher  
219 number of individuals, and thus increases the statistical power to detect selection. As demonstrated  
220 in Chacon-Duque et al (2018), however, there is notable population sub-structure within each  
221 country. To test for robustness of our selection signals to this sub-structure, we supplemented each  
222 of these analyses by testing subsets of individuals within a country based on their inferred ancestry

223 matching to Native American reference groups from Chacon-Duque et al. (2018). This gave six  
 224 additional tested groups with sufficient ancestry represented: ‘Mapuche’ (n=434) in Chile, ‘Chibcha  
 225 Paez’ (n=200) in Colombia, ‘Nahua’ (n=466) and ‘South Mexico’ (n=78) in Mexico, and ‘Andes  
 226 Piedmont’ (n=195) and ‘Quechua’ (n=147) in Peru (supplementary fig. S5). To infer the proportion  
 227 of African, European, and Native American ancestry in each Latin American, we applied  
 228 unsupervised ADMIXTURE with  $K=3$  clusters jointly to all CANDELA individuals and 553 Native  
 229 American, Iberian, and West African reference individuals (fig. 1a).

230 Note that the choice of surrogate populations defines the selection test between each surrogate and  
 231 its corresponding ancestral source in scenario (ii). In this way, our test acts as an analogue to  $F_{ST}$   
 232 comparing two populations, but while accounting for admixture in one of the populations. As an  
 233 illustration, we tested the Brazilian cohort for selection using northwest Europeans from England  
 234 and Scotland (GBR) from the 1000 Genomes Project (1KGP) (The 1000 Genomes Project  
 235 Consortium 2015) as a surrogate for the Brazilian cohort's European ancestry source  
 236 (supplementary fig. S6). Given the majority (~80%) of ancestry in the Brazilian cohort is related to  
 237 Iberian Europeans, this test is most-powered to detect selection acting along the branch separating  
 238 present-day northwest Europeans and descendants of Iberians who traveled to Brazil post-  
 239 Columbus. In this analysis, we infer strongest signals of selection at the *HERC2/OCA2* and  
 240 *LCT/MCM6* genes. This replicates previously reported selection signals when comparing northwest  
 241 Europeans to present-day Iberians (Poulter et al. 2003; Bersaglieri et al. 2004), and likely indicates  
 242 selection for lighter skin pigmentation and lactase persistence in northwest Europeans that is  
 243 unrelated to any selection in the Americas. As another example, we also tested each Latin American  
 244 cohort separately while using Han Chinese from Beijing (CHB) from the 1KGP as a surrogate for  
 245 Native American ancestry (supplementary fig. S7). In this analysis, SNPs that follow model (ii)  
 246 indicate selection along the branch separating present-day Han Chinese and Native American  
 247 populations. For this test, we find the strongest signals of selection at previously reported selected  
 248 genes in East Asians, including those related to alcohol metabolism such as *ADH7* and *ADH1B*  
 249 (Galinsky et al. 2016; Gu et al. 2018) that both are classified as selection under model (ii). The  
 250 strongest overall signal in this analysis overlapped the *POU2F3* gene, implicated in the regulation  
 251 of viral transcription, keratinocyte differentiation and other cellular events, which has been reported  
 252 to be under selection in Native American populations from throughout the Americas (Amorim et al.  
 253 2017).

254 For our main analyses, we use 205 Iberians (from 1KGP and Chacon-Duque et al. (2018)) to  
 255 represent European ancestry surrogates. Therefore, given the likely short split time between present-  
 256 day Iberians and Europeans that migrated to the Americas during the colonial era, we are  
 257 underpowered to detect selection in the European source only (see simulations). We use 206 West

Africans from the 1KGP to represent the African ancestry source, which has been reported as a good proxy to the African genetic sources (from Chacon-Duque et al. (2018)). For this reason, we should similarly have low power to find selection occurring only in the African source/surrogate. At any rate we do not test for selection related to African ancestry, because the Latin American cohort here have ~6% African ancestry on average, limiting power further. We combined 142 individuals with <1% non-Native American inferred ancestry from 19 Native American groups (supplementary table S1) to represent the Native American surrogate. By using individuals sampled from geographically spread Native American groups as the Native American ancestry surrogate, we aim to identify regional selection signals experienced by some Native American groups but not others. We also expect to have the highest power when testing for selection type (ii) in Native Americans, as there is likely to be the most time separating this ‘average’ Native American surrogate and the admixing source of each regional Latin American cohort. To avoid confounding our inference, we excluded individuals with >1% inferred ancestry matching to surrogates other than Native Americans, Iberian Europeans, and West Africans using SOURCEFIND (Chacon-Duque et al. 2018). Also, since the time since admixture among these groups is relatively short in the CANDELA cohort (likely <15 generations ago), detecting selection post-admixture can only identify relatively strong selection signals (see simulations).

#### ***AdaptMix identifies 47 regions of putative selection***

For each Latin American cohort, we considered SNPs under selection as those having  $P$ -values less than the  $5 \times 10^{-5}$  false-positive threshold in the population-matched neutral simulations, which corresponds to a model-based  $P$ -value of  $6.75 \times 10^{-6} - 1.07 \times 10^{-7}$  (supplementary table S2). For Chile, Colombia, Mexico and Peru, we report loci that pass these criteria both in the analysis of all individuals from that country and in at least one of three alternative analyses for that country that are designed to test for robustness to latent population structure (supplementary fig. S8). The first of these alternative analyses consisted of identifying signals of selection using AdaptMix on each of the six Native American subsets defined above (e.g., in either the ‘Andes Piedmont’ or ‘Quechua’ subset when testing for selection in Peruvians) (supplementary table S3). The other two alternative analyses were based on LAI. In particular we used ELAI (Guan 2014) to assign each genomic region of an admixed individual to a Native American, European, or African ancestral source. For the second alternative analysis, designed to test for post-admixture selection, we assessed whether the proportion of ancestry inferred from one of these three sources in a local region deviated substantially from the genome-wide average (supplementary table S4). For the third alternative analysis, designed to test for selection in the Native American source, we instead used the Population Branch Statistic (PBS) (Yi et al. 2010) to test for selection in one of the six Native

American subset groups defined above, using allele frequencies computed from LAI-inferred Native American segments from the subset of individuals representing that Native American group (see Methods) (supplementary fig. S5 and supplementary table S5).

Overall, we find 51 candidate regions to have evidence of positive or purifying selection passing the criteria above, 47 of which target protein-coding genes (supplementary table S6 and fig. 3). Four of these 47 candidate gene regions contain at least one SNP exhibiting strong evidence (likelihood ratio  $>1,000$ ) of selection affecting all admixed individuals regardless of ancestry proportions, which we assume reflects post-admixture selection. Furthermore, 18 of these 47 regions exhibit strong evidence of selection containing at least one SNP (likelihood ratio  $>1,000$ ) in the Native American source only. The 25 remaining candidate gene regions are unclassified into either type of selection (likelihood ratio  $\leq 1,000$ ).

To prioritize candidate casual genes, we annotated the protein-coding gene that had the highest overall Variant-to-Gene (V2G) scores (Ghoussaini et al. 2021) for the SNPs showing the strongest evidence of selection in each candidate gene region. The overall V2G score aggregates differentially weighted evidence of variant-gene association from several sources, including cis-QTL data, chromatin interaction experiments, *in silico* function predictions (e.g., Variant Effect Predictor from Ensembl), and distance between the variant and each gene's canonical transcription starting site. For each of these candidate genes we then annotated the phenotype with the highest overall association score based on the Open Targets Platform (Koscielny et al. 2017).

While most of these associated phenotypes represent genetic disorders, syndromes, or different types of measurements (medically or non-medically-related), many are also related to immune response and diet – two major selective forces that shape the human genome (Karlsson et al. 2014; Fan et al. 2016). We therefore organize the description of our candidate selection signals into two main sections below that cover only these two features, with signals of all other hits in supplementary table S6. For brevity, below we only highlight putatively selected regions where at least one significant SNP had an associated GWAS or eQTL signal. For our significant SNPs related to immune-response genes, GWAS signals included SNPs associated to white blood cell counts in a large multi-continental cohort (including Latin American individuals) (Chen et al. 2020), and eQTL signals included cis-associated SNPs to gene expression in 15 immune-related cell types from the DICE project (Schmiedel et al. 2018). For our significant SNPs related to diet, GWAS signals included metabolic, anthropometric, and lipid levels from the UK Biobank cohort

(Loh et al. 2018), and eQTL signals included cis-associated SNPs to gene expression in adipose, muscle, and liver tissue from the GTEx Project (Lonsdale et al. 2013).

### ***Signals at immune-related genes***

Fifteen of the 47 candidate gene regions contained at least one protein-coding gene either related to the development or regulation of the immune system or that has been previously associated to the quantification of immune cell types, susceptibility progression to infectious diseases, or autoimmune disorders. For example, we replicate a well-known signal encompassing several immune-related genes at 6p21 that are part of the human leukocyte antigen (HLA) system (fig. 4 and supplementary fig. S9-S11). These included SNPs (AdaptMix  $P$ -value $<5.00\times10^{-7}$ ) near several MHC class I genes (*HLA-G*, *HLA-H*, *HLA-A*, and *HLA-J*) in each of the Chilean, Colombian, Mexican and Peruvian cohorts, with the Colombian cohort containing several SNPs classified as being selected post-admixture (likelihood ratio $>1,000$ ). Encouragingly, we inferred African ancestry enrichment ( $Z$ -score $>2.5$ ) in each cohort  $\sim 60$ kb downstream from our top AdaptMix signals using LAI, with maximum  $Z$ -score $>9$  (one-sided  $P$ -value $<4.09\times10^{-21}$ ) in the Chilean cohort (fig. 4). In addition, other signals were inferred upstream in the Chilean cohort at a 5' UTR SNP of the *ZBTB12* gene (rs2844455, AdaptMix  $P$ -value $=5.45\times10^{-8}$ ), the Mexican cohort at an intronic SNP of *HLA-DMA* (rs28724903, AdaptMix  $P$ -value $=3.87\times10^{-8}$ ), and the Peruvian cohort at an intronic SNP of the MHC class III gene *STK19* (rs6941112, AdaptMix  $P$ -value $=7.57\times10^{-9}$ ). Many of these HLA genes have been previously characterized as subject to be under selection post-admixture in different Latin American populations by showing an excess of African ancestry at the HLA locus (Tang et al. 2007; Basu et al. 2008; Ettinger et al. 2009; Guan 2014; Rishishwar et al. 2015; Deng et al. 2016; Zhou et al. 2016; Norris et al. 2020; Vicuna et al. 2020).

In addition to HLA, we infer previously unreported selection signals in four candidate gene regions that each harbor genes with well-established roles in the immune system, with each region containing at least one SNP significantly associated ( $P$ -value $<5\times10^{-8}$ ) to white blood cell counts or the expression of an immune-related gene in immune cells ( $P$ -value $<10^{-5}$ ) (see Methods). Among these, one signal at 1p13 in the Chilean cohort encompasses the *CD101* gene (fig. 5a), which belongs to a family of cell-surface immunoglobulins superfamily proteins and plays a role as an inhibitor of T-cell proliferation (Soares et al. 1998; Bouloc et al. 2000). Within this region five SNPs are classified as being selected post-admixture and show also an increase of LAI-inferred European ancestry (maximum  $Z$ -score $=3.40$ , one-sided  $P$ -value $=3.36\times10^{-4}$ ). Strikingly, the region contains a synonymous SNP (Ile588, CADD score of 9.23) (rs3736907, AdaptMix  $P$ -value $=1.05\times10^{-9}$ ) that strongly affects *CD101* expression in T cells (eQTL  $P$ -value  $< 2.42\times10^{-10}$ )

and is associated with neutrophil (GWAS  $P$ -value= $2.08 \times 10^{-10}$ ) and total white cell count (GWAS  $P$ -value= $3.61 \times 10^{-9}$ ) (fig. 5a).

The second signal, at 18p11 also in Chileans, encompasses the *PTPN2* gene, a tyrosine-specific phosphatase involved in the Janus kinase (JAK)-signal transducer and activator of transcription (STAT) signaling pathway (fig. 5b). The JAK-STAT pathway has an important role in the control of immune responses, and dysregulation of this pathway is associated with various immune disorders (Shuai and Liu 2003). Several SNPs with low AdaptMix  $P$ -values ( $P$ -value $<1.69 \times 10^{-7}$ ) in the 18p11 region are also associated with eosinophil counts (GWAS  $P$ -value $<1.13 \times 10^{-10}$ ) and the expression of *PTPN2* in natural killer (NK) cells (eQTL  $P$ -value $<1.14 \times 10^{-9}$ ) (fig. 5b).

The other two novel signals, both in the Peruvian cohort, are consistent with selection in Native Americans only (likelihood-ratio $>1,000$ ). The first, at 17q25, contains the *CD300LF* gene that encodes for a membrane glycoprotein that contains an immunoglobulin domain, and which plays an important role in the maintenance of immune homeostasis by promoting macrophage-mediated efferocytosis (Borrego 2013). Notably, a 3'UTR SNP (rs9913698, AdaptMix  $P$ -value= $3.11 \times 10^{-9}$ ) is strongly associated with monocyte count (GWAS  $P$ -value= $1.00 \times 10^{-33}$ ), total white cell count (GWAS  $P$ -value= $5.96 \times 10^{-24}$ ), lymphocyte count (GWAS  $P$ -value= $2.50 \times 10^{-19}$ ), and neutrophil count (GWAS  $P$ -value= $1.30 \times 10^{-9}$ ) (supplementary fig. S12). The second signal is at 22q11 adjacent to the *MIF* gene (fig. 5c), which is implicated in macrophage function in host defense through the suppression of anti-inflammatory effects of glucocorticoids (Calandra and Roger 2003). Variants within *MIF* have been recently associated to rheumatoid arthritis in southern Mexican patients (Santoscoy-Ascencio et al. 2020). The SNP rs2330635 (AdaptMix  $P$ -value= $7.06 \times 10^{-8}$ ) is strongly associated to the expression of *MIF* in T-cells (eQTL  $P$ -value $<8.63 \times 10^{-5}$ ) and NK cells (eQTL  $P$ -value= $5.77 \times 10^{-9}$ ) and is also marginally associated to neutrophil counts (GWAS  $P$ -value= $2.46 \times 10^{-6}$ ) (fig. 5c).

Overall, these findings suggest that some of the most robust signals of adaptation in the Americas can be ascribed to immune-related selective pressures. These plausibly resulted from both the introduction of novel pathogens after European colonization and the endemic pathogens encountered by the first Native Americans during the initial peopling of the continent.

### ***Signals at genes related to diet***

Among the 47 candidate regions, nine regions contained at least one protein-coding gene potentially related to dietary practices through their association with metabolism-related phenotypes or

anthropometric-related measurements (supplementary table S6). Among these, we infer three previously unreported signals where at least one of the selected SNPs was associated to metabolic- or anthropometric-related phenotypes, or to the expression of the candidate gene in adipose, muscle, or liver tissue (see Methods). One of these three hits (rs4636058, AdaptMix  $P$ -value= $5.70 \times 10^{-10}$ ), at 6p22 in the Chilean cohort, is classified as being selected post-admixture and shows an increase of LAI-inferred European ancestry ( $Z$ -score=3.78, one-sided  $P$ -value= $7.82 \times 10^{-4}$ ). It is located at 6q22 and encompasses the *SLC35F1* gene, whose function is not known, though several studies have associated this gene with different measurements of cardiac function (Hoffmann et al. 2017; Warren et al. 2017; Giri et al. 2019). Notably, SNP rs4636058 is marginally associated to cholesterol levels (UKBB GWAS  $P$ -value= $3.8 \times 10^{-4}$ ) and body fat percentage (UKBB GWAS  $P$ -value= $4.29 \times 10^{-4}$ ). Another of these three hits, at 1q31 in the Mexican cohort, is consistent with selection in Native Americans (likelihood-ratio>1,000) (fig. 6a). The 1q31 signal includes an intronic SNP (rs1171148, AdaptMix  $P$ -value= $2.31 \times 10^{-8}$ ) of *BRINP3*, a gene associated to body mass index in studies across different human groups (Pulit et al. 2019; Zhu et al. 2020). Within this region, various SNPs are associated to different metabolic-related phenotypes, including the SNP rs1171148 that is associated with hip circumference (UKBB GWAS  $P$ -value= $4.96 \times 10^{-8}$ ) and marginally associated with body mass index (UKBB GWAS  $P$ -value= $5.51 \times 10^{-5}$ ) (fig. 6a).

Finally, the third hit (rs5030938, AdaptMix  $P$ -value=  $3.79 \times 10^{-15}$ ), which had the highest overall AdaptMix score, is inferred in the Peruvian cohort at 10q22 and indicates selection in Native Americans (likelihood-ratio>1,000) (fig. 6b). This SNP is associated with the expression of *HKDC1* in liver (eQTL  $P$ -value= $2.19 \times 10^{-5}$ ), adipose visceral (eQTL  $P$ -value= $1.46 \times 10^{-5}$ ), and adipose subcutaneous tissue (eQTL  $P$ -value= $1.36 \times 10^{-4}$ ) (fig. 6b). *HKDC1* encodes a hexokinase that catalyzes the rate-limiting and first obligatory step of glucose metabolism (Ludvik et al. 2016), and several studies have associated variants within this gene with glucose levels in pregnant women (Hayes et al. 2013; Guo et al. 2015; Kanthimathi et al. 2016; Tan et al. 2019) and with weight at birth (Warrington et al. 2019).

Overall, these results support previous hypothesis that genes related to energy metabolism were probably critical in the establishment of stable human populations in distinct ecoregions (Hancock et al. 2010), including those of the Americas (Amorim et al. 2017; Reynolds et al. 2019).

## Discussion

### Analytical considerations

Here we present AdaptMix, a novel statistical model that identifies loci under selection in admixed populations. Our model is based on the principle that allele frequencies in an admixed population can be modeled as a linear combination of the allele frequencies in the ancestral populations proportional to their admixing contributions, and that deviations from the expectation can be a product of selection. This selection test is related to the work of Long (1991) and Mathieson et al. (2015). One difference is that our approach directly infers and models the variance of the predicted allele frequencies in the admixed population given the set of surrogates used for ancestral sources. This parameter can help control for large deviations in allele frequency arising solely from genetic drift experienced in the admixed population (Long 1991; Bhatia et al. 2014) and/or from using inaccurate proxies for one or more of the source populations. In some applications here, e.g. the Brazilian cohort, AdaptMix gives  $P$ -values with a median near 0.5 as expected under the null hypothesis of neutrality, indicating a correction approach such as genomic control may not be necessary as in Mathieson et al. (2015) (supplementary fig. S13). However, simulations under neutrality that follow a slightly different model than our inference approach (see Methods), shows AdaptMix gives both an excess of high and low  $P$ -values relative to the uniform distribution expected under neutrality (supplementary fig. S14). This suggests our  $P$ -values are not well-calibrated, perhaps reflecting deviations from the underlying model and necessitating caution when choosing thresholds for significance. We thus based our significance thresholds on neutral simulations tailored to each cohort, and focus only on the strongest association signals that resulted in low false-positive rates based on simulated neutral SNPs. However, we caution that necessarily simulations are over-simplifications of complex latent demographic processes, and more work is required to verify these signals.

Another important contribution of our test is that it can infer whether selection disproportionately affects one source/surrogate pairing or affects all ancestry backgrounds equally. We assume selection affecting all ancestry backgrounds indicates selection occurring post-admixture, which is more parsimonious than an alternative explanation of independent selection events differentiating allele frequencies between each admixing source and its surrogate. For inferred selection in a source/surrogate pairing, this can reflect selection occurring in that source and/or its surrogate, possibly even following the admixture event. Post-admixture selection affecting only one source may be possible in cases of selection only occurring in a particular environment that is correlated with admixture fractions. For example, selection we detect to occur in Native Americans may be attributable to Europeans introducing a new environmental pressure (e.g. infectious disease) that disproportionately affected fitness in indigenous Americans. However, the split time between the true Native American ancestral source and our Native American surrogate is likely much longer

than the time since colonial era admixture, suggesting selection pre-admixture as a more plausible explanation given the longer time to act. Supporting this, our inferred selection coefficients (which are summed over time) in cases where we conclude selection in Native Americans are typically greater than 2 (supplementary table S6). If selection had occurred post-admixture continuously over the last 12 generations (corresponding to an admixture date of ~1650CE), this value approximately corresponds to a per generation selection coefficient ~0.16, which is strong relative to previous reports of recent selection in human populations (e.g. Hamid et al. (2021)). In contrast, our four signals concluding post-admixture selection infer a per generation selection coefficient <0.1, which falls more in line with previous inference of selection strengths.

For 18 genomic regions where we conclude selection in the Native American source (supplementary table S6), it is possible this is capturing selection in (some subset of) groups that comprise the Native American surrogate group we use here, rather than in the (more localized) Native American source of the admixed population. The lack of overlap in selection signals when analysing the five CANDELA cohorts, and lack of concordance of our signals with those from PBS testing for selection in this combined Native American surrogate (supplementary fig. S15), suggests our signals are not being driven by selection in this combined population in practice. Furthermore, when using PBS to test for selection in LAI-inferred Native American segments from individuals with high degrees of ancestry recently related to the tested Native American source, an analysis that does not use the combined Native American surrogate, PBS scores for SNPs in 6 of these 18 regions fall into the top 99.99<sup>th</sup> percentile (supplementary fig. S16-21), with the remaining 13 regions containing SNPs in the top 99<sup>th</sup> percentile. However, relative to our approach, LAI-based inference (e.g., Avila-Arcos et al. (2020)) may be more robust to using combined data from multiple populations to represent one surrogate, since it only requires matching to a subset of individual's haplotype patterns in the reference panel.

In general our approach has decreased power to distinguish whether selection occurred post-admixture versus in one of the ancestral sources, if reference population allele frequencies are very different and selection is weak (fig. 1c). Inferring excess ancestry matching using LAI would likely better capture post-admixture selection in such cases, e.g. a scenario where one population that is fixed (or nearly-fixed) for the protective allele intermixes with a population nearly-fixed for the non-protective allele, with the admixed population subsequently undergoing selection. An example of this is a recently reported excess of African ancestry, likely attributable to post-admixture selection, on the Duffy-null allele in inhabitants of Santiago Island in Cape Verde (Hamid et al. 2021). However, our test to detect whether *any* type of selection occurred should not be affected by

these scenarios. In addition, our approach may identify post-admixture selection in scenarios that excess-ancestry LAI-based would miss by design, such as cases where the selected allele is at a similar frequency in all reference populations. Perhaps the most important contrast to LAI and other approaches detecting selection in admixed populations (Cheng et al. 2021), is that in principle our approach can be applied to populations that descend from the mixture of genetically similar groups, e.g. if using haplotype-based approaches (e.g. SOURCEFIND) to infer ancestry proportions. Future work should assess the power of this technique under such admixture settings.

While our method assumes a single pulse of admixture, theoretically our ability to diagnose and classify selection occurring in only one source should not be affected by multiple instances of (or continuous) admixture from that or any other source. This is because the signal of allele frequency deviation due to selection in such cases is entirely determined by the amount of ancestry inherited from that source, and not the number of admixture pulses. In contrast, if an admixed population experiences selection and then receives new migrants from one of the original admixing sources that are unaffected by this selection, e.g. later European migrants to the Americas, in theory this may attenuate our ability to determine that selection occurred post-admixture. However, in a simple scenario of one such additional admixture pulse, contributing 10-50% of DNA, the correct post-admixture selection theoretical model fits as well or better to the theoretical truth than does the incorrect model concluding selection in the source that did not contribute new migrants (supplementary fig. S22).

As noted above, and consistent with other tests comparing populations (Mathieson 2020), the choice of surrogate group can make a difference in the inferred selection signals. For example, our largest signal of Native American selection, at 10q22 and most strongly signalled in the ‘Andes Piedmont’ Peruvian subgroup, disappears if replacing the ‘combined Native American’ surrogate group with Han Chinese (CHB from the 1KGP) (supplementary fig. S7). In this case, the frequency of the putatively selected allele (rs5030938) is 67% in LAI-inferred Native haplotypes in the Peruvian ‘Andes Piedmont’ subgroup, which is notably higher than the 38-54% observed in LAI-inferred Native American haplotypes in four non-Peruvian sub-groups, and thus consistent with selection (supplementary table S7). However, it is lower than that of CHB (~76%), which explains the lack of signal when using CHB as a surrogate. The frequency in Yakut, a Siberian group that perhaps better represents ancestral Native Americans than CHB does (Wang et al. 2007), is closer to that of frequency estimates across non-Peruvian Native American groups (0.46-0.5). In general, there is a trade-off between using surrogates more distantly related to the source, which may decrease power to find regional adaptation signals, versus choosing a more closely related

surrogate, which may also decrease power by masking adaptation signatures that it shares with the target source (e.g. using Iberians as a surrogate for European ancestry of Latin Americans). Our inferred variance parameter can be used to investigate how well a given surrogate captures genetic variation in the target population, with for example the inferred variance using CHB as a surrogate ~5-10-fold higher relative to using the combined Native American surrogate.

### ***Selection signals detected in the CANDELA cohort***

The candidate genes we infer to be affected by selection in Latin Americans and their Native American ancestors are best viewed in the context of other previously reported signals. Reynolds et al. (2019) recently performed a selection scan in three Native North American populations and identified some of the strongest signals at immune-related genes including the interleukin 1 receptor Type 1 (*IL1R1*) gene in a sample from several closely related communities in the southeastern United States, and the mucin 19 (*MUC19*) gene in a central Mexican population. We do not replicate the MUC19 signal in the CANDELA Mexican cohort, which could indicate that the Native American component in this cohort is not closely related to that of the central Mexican Native American group. Nonetheless, we found some of our strongest signals of selection at several loci encompassing genes involved in the immune response, including *CD300LF* and *MIF*, detected as being selected in the Native American ancestors of Peruvians. Interestingly, *CD300LF* promotes macrophage-mediated efferocytosis, while *MIF* play a role regulating macrophage function through the suppression of glucocorticoids. These observations suggest that these two genes might have perhaps evolved in a coordinated manner, possibly due to their phagocytic-related role against the novel pathogens encountered in the Americas.

Regarding signals of selection post-admixture, several studies have consistently shown adaptive signals in different Latin American populations at HLA by showing an excess of matching to African reference haplotypes using LAI (Tang et al. 2007; Basu et al. 2008; Ettinger et al. 2009; Guan 2014; Rishishwar et al. 2015; Deng et al. 2016; Zhou et al. 2016; Norris et al. 2020; Vicuna et al. 2020). Given that African ancestry was enriched at this region, the authors suggested that certain African alleles could have conferred a selective advantage to certain infectious diseases most likely brought by Europeans. While AdaptMix is only able to classify selection in one cohort (Colombia) out of our four HLA signals, we also replicated this excess of African ancestry in each of the CANDELA cohorts (supplementary fig. S9). There is some debate as to whether these signals are genuine or attributable to confounders such as inaccurate LAI inference (Pasaniuc et al. 2013). To illustrate the validity of these concerns, people with entirely Northwest European ancestry from Britain infer excess ancestry related to Africa in HLA, which – though perhaps influenced by

genuine selection at HLA in Northwest Europeans – presumably does not reflect genuine recent African ancestry (supplementary fig. S23). Instead this is more likely attributable to the relatively high degree of genetic diversity in HLA mimicking African genetic diversity, illustrating how these LAI-based tests can give false-positive signals when testing for post-admixture selection. This may explain why AdaptMix does not replicate the moderate amount of excess African ancestry inferred by LAI at HLA in the Brazilian cohort (supplementary fig. S9), which is predominantly of European ancestry. Indeed regions under selection in admixed populations may be particularly difficult to classify accurately using LAI, e.g. with the HLA region here having the lowest overall LAI classification probability (supplementary fig. S24), especially in cases where the reference population have not experienced similar selection and hence may have poorly matching genetic variation patterns. As our approach does not require LAI, it is robust to these issues. While our model is not able to classify selection as post-admixture at most of our HLA signals, allele frequency patterns in the admixed cohorts are consistent with post-admixture selection and often show allele frequencies drifting away from those expected under our neutral model and towards those of the African or European reference population (supplementary fig. S25). This is most evident in the Colombian cohort, consistent with Africans contributing protective alleles as previously suggested (Tang et al. 2007; Basu et al. 2008; Ettinger et al. 2009; Guan 2014; Rishishwar et al. 2015; Deng et al. 2016; Zhou et al. 2016; Norris et al. 2020; Vicuna et al. 2020). In addition to HLA, we also identified a novel post-admixture selection signal in the Chilean cohort that was accompanied by a significant increase of European ancestry at the *CD101* locus, again, suggesting that protective alleles from Europeans might have also been adaptive to counter Old World-borne diseases brought to the Americas.

The signals encompassing genes related to metabolic and anthropometric-related phenotypes are consistent with novel dietary practices in the Americas driving adaptation, with many signals with an effect on relevant phenotypes and/or tissues, classified as being selected in the Native American source. Previous studies have shown evidence of adaptation at genes related to metabolic-related phenotypes and attributed the adaptation to dietary pressures in Native Americans. Avila-Arcos et al. (2020) recently reported strong signals of selection in the Mexican Huichol at several genes associated to lipid metabolism, including *APOA5* and *ABCG5*. We do not replicate these signals in the CANDELA Mexican cohort, which could indicate that the Native American component in this cohort is not closely related to that of the Huichol. The signals at *APOA5* and *ABCG5* are in line with a previous finding of a strong selection signal at another ATP-binding cassette transporter A1 (*ABCA1*) gene that has been associated with low high-density lipoprotein cholesterol in Latin Americans (Villarreal-Molina et al. 2008; Acuña-Alonzo et al. 2010). As the ABCA1 protein

607 carrying the putative selected allele shows a decrease cholesterol efflux, the authors suggest that  
 608 this variant could have favored intracellular cholesterol and energy storage, which in turn might  
 609 have beneficially influenced the ability to accommodate fluctuations in energy supply during severe  
 610 famines and during the regulation of reproductive function (Acuña-Alonzo et al. 2010). Lindo et al.  
 611 (2018) used a genomic transect of Andean highlanders from northern Peru, and found the strongest  
 612 signals of selection at *MGAM*, a gene related to starch digestion. The authors attributed this finding  
 613 to a dietary-related selective pressure perhaps brought by the transition to agriculture in this region.  
 614 AdaptMix shows evidence in the CANDELA Peruvian cohort within *MGAM* (rs7810984,  
 615 AdaptMix  $P$ -value= $1.79 \times 10^{-8}$ , above 99.9<sup>th</sup> percentile) only when using CHB as a surrogate for  
 616 Native American ancestry. This again illustrates how the choice of surrogate populations defines the  
 617 selection test between each surrogate and its corresponding ancestral source. It is possible that by  
 618 including Andean Native Americans in our Native American source population (supplementary  
 619 table S1) we are affecting the power to detect selection in the Andean Native American ancestors of  
 620 the CANDELA Peruvian cohort, analogous to how Lindo et al. (2018) no longer detect selection at  
 621 *MGAM* if using PBS to compare ancient and present-day (Aymara) Andean groups.

622

623 Studies have also reported signals of selection in Native Americans groups shared with Siberian  
 624 populations, which the authors interpreted as an adaptation to polyunsaturated-rich diets prior or  
 625 close to the peopling of the Americas, likely in the Arctic Beringia. These included a signal  
 626 overlapping the *WARS2* and *TBX15* genes, previously associated to body fat distribution and  
 627 adipose tissue differentiation (Racimo et al. 2017), and the fatty acid desaturase (*FADS*) gene  
 628 cluster that modulates the manufacture of polyunsaturated fatty acids (Amorim et al. 2017; Harris et  
 629 al. 2019) (but see Mathieson (2020) for an alternative explanation of the *FADS* signal). Again, we  
 630 inferred moderate selection evidence at these regions in the CANDELA Peruvian cohort only when  
 631 using CHB as surrogate for Native American ancestry (SNP rs2361028 near *TBX15*, AdaptMix  $P$ -  
 632 value= $1.8 \times 10^{-7}$ , above 99.5<sup>th</sup> percentile; SNP rs174576 within *FADS2*, AdaptMix  $P$ -value= $3.8 \times 10^{-8}$ ,  
 633 above 99.5<sup>th</sup> percentile). It is thus tempting to suggest that the three novel signals of selection  
 634 AdaptMix classifies as being under selection in Native Americans might be related to dietary  
 635 pressures experienced prior or during the peopling of the Americas (e.g., the *BRINP3* signal  
 636 detected in Mexicans), or as a product for a greater reliance of domesticated crops including  
 637 potatoes (3400–1,600 CE) (Rumold and Aldenderfer 2016) (e.g., the *HKDC1* signal detected in  
 638 Peruvians). However, it is important to note that other factors may also be attributable for some of  
 639 these selection signals.

640

641 Of potential adaptive interest is the *STOX1* gene detected in the Peruvian cohort close to our highest

overall selection signal within *HKDC1* at 10q22 (fig. 6b). Mutations within *STOX1* have been associated to preeclampsia (Van Dijk et al. 2005; van Dijk and Oudejans 2011), a pathology of pregnancy characterized by high blood pressure and signs of damage to other organ system that can be lethal for the mother and for the fetus (Sibai 2003). Interestingly, in the single linkage study on preeclampsia conducted in Andean Peruvian families to date, SNPs within *STOX1* show marginal association ( $P$ -value=0.004678) (supplementary fig. S26) (Badillo Rivera and Nieves Colón et al. 2021). Given that high altitude is linked to an increased incidence of preeclampsia (Zamudio 2007), it is possible that natural selection has acted on genes related to this condition. Furthermore, the fact that variants within *HKDC1* are associated with glucose levels in pregnant women (Hayes et al. 2013; Guo et al. 2015; Kanthimathi et al. 2016; Tan et al. 2019) and considering the relationship between abnormal glucose levels and preeclampsia (Joffe et al. 1998; Weissgerber and Mudd 2015), it is also possible that natural selection has targeted variants at *HKDC1* due to its role in glucose metabolism.

Lastly, other environmental factors may also be attributable for some of these selection signals, such as infectious diseases. There is growing evidence of a link between metabolic diseases and innate immunity or inflammation (Pickup and Crook 1998; Kominsky et al. 2010; Lumeng and Saltiel 2011; Robbins et al. 2014). For instance, it has been shown that cholesterol plays a key role in various infectious processes such as the entry and replication of flaviviral infection (Osuna-Ramos et al. 2018). Additional studies in indigenous American populations will be needed to disentangle the putative selective pressures at these loci.

## Conclusion

We have presented a novel allele frequency-based method that identifies loci under selection in admixed populations, while determining whether the selection affected all ancestral sources equally, indicating selection following admixture, or in only one of the sources. The novel candidate genes under selection provide new insights into the adaptive traits necessary for the early habitation of the Americas and to respond to the challenge of infectious pathogens corresponding to European contact. Future functional investigations will allow a more detailed understanding of the consequences of selective pressures experienced in the American continent, including its effect on present-day health outcomes.

## 674 **Materials and Methods**

675

### 676 ***Genomic datasets***

677 The Latin American individual samples analyzed here were part of CANDELA Consortium (Ruiz-  
678 Linares et al. 2014). The CANDELA Consortium samples (<http://www.ucl.ac.uk/silva/candela>)  
679 have been described in detail in previous publications (Ruiz Linares et al 2014; Chacon-Duque et  
680 al., 2018). These data include a total of 6,630 volunteers from five Latin American countries  
681 (Brazil, Chile, Colombia, Mexico and Peru). This dataset was genotyped on the Illumina  
682 HumanOmniExpress chip platform including 730,525 SNPs. We also collated reference populations  
683 from regions that have contributed to the admixture in Latin America. For Native American  
684 samples we used individuals previously genotyped by Chacon-Duque et al. (2018). This dataset  
685 comprises 19 Native American populations from throughout the Americas with genotype data  
686 (supplementary table S1). For all the analyses described, we have only retained Native American  
687 individuals that showed more than 99% Native American ancestry as estimated by ADMIXTURE  
688 (see below). For European samples, we used genotype data from Portuguese and Spanish,  
689 individuals previously genotyped by Chacon-Duque et al. (2018) and Spanish (IBS; Iberian  
690 Population in Spain) from the 1000 Genomes Project study (The 1000 Genomes Project Consortium  
691 2015). For Sub-Saharan Africans, we used genotype data from Yoruba (YRI; Yoruba in Ibadan,  
692 Nigeria), and Luhya (LWK; Luhya in Webuye, Kenya) individuals from the 1KGP. The reference  
693 samples from Chacon-Duque et al. (2018) are described in more detail in the Supplementary Table  
694 1 from the mentioned publication. For some of our analysis we also included the 103 Han Chinese  
695 from Beijing (CHB) and 85 Europeans from England and Scotland (GBR) from the 1KGP as a  
696 surrogate for the Native American and European source, respectively. Genotype data of the  
697 individuals from the 1KGP was downloaded from the 1000 Genomes Project FTP site available at  
698 <ftp://ftp.1000genomes.ebi.ac.uk/vol1/ftp/>.

699

### 700 ***Data curation***

701 We used PLINK v1.9 (Chang et al. 2015) to exclude SNPs and individuals with more than 5%  
702 missing data or that showed evidence of genetic relatedness as in Chacon-Duque et al. (2018). Due  
703 to the admixed nature of the Latin American samples, there is an inflation in Hardy-Weinberg  $P$ -  
704 values, and therefore we did not exclude SNPs based on Hardy-Weinberg deviation. After applying  
705 these filters, 625,787 autosomal SNPs and 7,986 individuals were retained for further analysis.

706

## ***Selecting admixed Latin American and reference individuals***

In order to select admixed Latin American individuals (i.e. individuals with varying degrees of Native American, European and African ancestry), we conducted an unsupervised ADMIXTURE analysis at  $K=3$  using a set of 103,426 LD-pruned SNPs including Native Americans, Iberian Europeans and West Africans. We then removed non-admixed Latin American individuals that we define as having less than 10% or more than 90% Native American genome-wide ancestry. To avoid confounding our selection inference due to underlying population structure, we further excluded individuals with  $>1\%$  inferred ancestry matching to surrogates other than Native Americans, Iberian Europeans, and West Africans using SOURCEFIND estimates obtained for the same individuals in Chacon-Duque et al. (2018). After this filtering procedure, the five Latin American populations consisted of 190 Brazilians (BRA), 1125 Colombians (COL), 896 Chileans (CHL), 773 Mexicans (MEX) and 834 Peruvians (PER). From our Native American, European, and Sub-Saharan African reference populations, we also removed individuals that contained more than 1% of ancestry from another group based on the ADMIXTURE analysis described above. After this extra filter our final reference dataset was composed of 142 Native Americans, 205 Europeans, and 206 Sub-Saharan Africans.

## ***Change in allele frequency under Wright-Fisher with multiplicative model of selection***

Assuming a multiplicative model of selection and random mating, the frequency of the three genotypes in generation 1 at a biallelic locus with alleles  $A$  and  $a$  at frequencies  $p$  and  $1 - p$ , respectively, in the previous generation is:

| $AA$                    | $Aa$                        | $aa$              |
|-------------------------|-----------------------------|-------------------|
| $(1 + s_1)^2 p^2 / c_1$ | $(1 + s_1) 2p(1 - p) / c_1$ | $(1 - p)^2 / c_1$ |

where  $s_1 \in [-1, \infty]$  is the selection coefficient in generation 1 and  $c_1 = (1 + s_1)^2 p^2 + (1 + s_1) 2p(1 - p) + (1 - p)^2$ . Note that each copy of the  $A$  allele changes fitness by a factor of  $(1 + s_1)$ .

More generally, the allele frequency  $p_g$  of allele  $A$  in generation  $g$  is:

$$p_g = \frac{(1 + s)p}{1 + sp}, \quad (1)$$

where

$$s = [\sum_{i=1}^g s_i] + [\sum_{j=1}^{g-1} (s_j \sum_{i=j+1}^g s_i)] + \sum_{i=3}^g \Pi_i \approx \sum_{i=1}^g s_i, \quad (2)$$

with  $s_i$  the selection coefficient at generation  $i$  and  $\Pi_i$  the sum of the products of all  $\binom{g}{i}$  combinations of  $\{s_1, \dots, s_i\}$  values. The approximation in equation (4) assumes the  $s_i$  are small, which should be a reasonable approximation based on e.g. estimated selection coefficients in humans.

### Testing for evidence of selection at a SNP

To assess the evidence of selection at a SNP, we employ a model inspired by that used in Mathieson et al. (2015) and based on the Balding-Nichols formulation (Balding and Nichols 1995). In particular for the allele count  $X_j$  at SNP  $j$  in the target population, we assume:

$$Pr(X_j = x_j | M, p_j, D) = \text{Beta-Binomial} \left( x_j; 2M, \frac{1-D}{D} p_j, \frac{1-D}{D} (1-p_j) \right), \quad (3)$$

where  $M$  is the number of target individuals. The above model implicitly assumes that the frequency of the allele in the target population follows a  $\text{Beta}(\text{mean} = p_j, \text{variance} = D p_j (1 - p_j))$ . Under neutrality, we assume

$$p_j = \frac{1}{M} \sum_{k=1}^K \left( \left[ \sum_{i=1}^M \alpha_k(i) \right] f_{jk} \right), \quad (4)$$

where  $f_{jk}$  is the sampled frequency of the allele in the surrogate population at SNP  $j$  for source  $k$ , and  $\alpha_k(i)$  is the inferred admixture proportion from population  $k$  in individual  $i$ . We first find  $\hat{D}$  as the value of  $D$  that maximizes  $\prod_{j=1}^J [Pr(X_j | M, p_j, D)]$ , using the optim function in R with the ‘Nelder-Mead’ algorithm. Then, fixing  $D = \hat{D}$  in equation (3), for each SNP we find the two-sided  $P$ -value testing the null hypothesis that the observed allele counts follow this neutral model.

The variance under (3) is small for SNPs with very high or very low  $p_j$ , so such SNPs tend to reject this null model even in cases where the observed target population allele frequency does not deviate notably from its neutral expectation  $p_j$  in (4). Therefore, we used an alternative parameterisation where we assumed the frequency of the allele in the target population follows a  $\text{Beta}(\text{mean} = p_j, \text{variance} = V)$ . This was achieved by substituting  $D$  in equation (3) at SNP  $j$  with

766  $\min \left[ \frac{V}{p_j(1-p_j)}, 0.99999 \right]$ , necessary to ensure numerical stability, and finding  $\hat{V}$ . In practice this  
 767 means that SNPs with minor allele frequency  $< (1.00001 \times V)$  had variance  $(0.99999 p_j(1-p_j))$   
 768 rather than  $V$ , though this approach gave sensible results in practice.

769

# 770 ***Determining whether selection occurred pre or post-admixture***

771 Consider the scenario in supplementary fig. S27, where sampled population C descends from an  
 772 admixture of unsampled populations  $A^*$  and  $B^*$ , who are represented by sampled surrogate  
 773 populations A and B, respectively. Our test aims to distinguish whether selection occurred post-  
 774 admixture along branch (e) versus along any of branches (a)-(d). Let  $f_c$  be the allele frequency of a  
 775 sample from population C. At a neutral SNP:

776

$$E[f_c] = \alpha f_{A^*} + (1 - \alpha) f_{B^*}, \quad (5)$$

777

778 where  $f_{A^*}$  and  $f_{B^*}$  are true allele frequencies of  $A^*$  and  $B^*$  at the SNP, respectively, and  $\alpha$  is the  
 779 admixture proportion from  $A^*$ . Letting  $f_k$  be the sampled allele frequency for population  $k$  serving  
 780 as surrogate to the true admixing population  $k^*$ , it seems reasonable to assume:

781

$$E[f_c] = \alpha f_A + (1 - \alpha) f_B. \quad (6)$$

782

783 Note that this also holds under selection along branch (f) in supplementary fig. S27, which we  
 784 ignore here (but which can be tested by comparing allele frequencies in A and B). Equation (6)  
 785 assumes that  $f_A$  and  $f_B$  are equally good proxied for the admixing populations' frequencies  $f_{A^*}$  and  
 786  $f_{B^*}$ , respectively, at the SNP, which may not be true. We test the effect of this using simulations,  
 787 described below, in which surrogates vary in how well they reflect their respective true admixing  
 788 sources.

789

790 In the case of a multiplicative model of selection along branch (e) in supplementary fig. S27 at this  
 791 SNP, using equation (1) we assume:

792

$$E[f_c] = \frac{(1 + s)[\alpha f_A + (1 - \alpha) f_B]}{1 + s[\alpha f_A + (1 - \alpha) f_B]} \equiv E_c[f_c], \quad (7)$$

793

794 where  $s$  is the selection strength (i.e. equation [2]) along branch (e).

Alternatively, under a multiplicative model for selection along branches (a) and/or (c) in supplementary fig. S27, with analogous results for selection along branches (d) and/or (b), instead we assume:

$$E[f_c] = \alpha \left[ \frac{(1 + s_A)f_A}{1 + s_A f_A} \right] + (1 - \alpha)f_B = f_B + \alpha \left[ \frac{(1 + s_A)f_A}{1 + s_A f_A} - f_B \right] \equiv E_A[f_c], \quad (8)$$

where  $s_A$  is the selection strength along branches (a) and/or (c). Importantly,  $E_A[f_c]$  is linear in  $\alpha$ , while  $E_C[f_c]$ , is not, which we aim to exploit to distinguish between these two scenarios.

Here, assuming CANDELA population  $T$  can be described as a mixture of  $K$  sources, we assume the genotype  $g_i$  of individual  $i \in [1, \dots, M]$  from  $T$  follows:

$$g_i \sim \text{Binomial}(2, f_T(i)). \quad (9)$$

Under neutrality, we set  $f_T(i)$  in (9) to:

$$f_T^N(i) = \sum_{k=1}^K [\alpha_k(i) f_k], \quad (10)$$

where  $f_k$  is the sampled allele frequency at the given SNP for the surrogate population to the source contributing  $\alpha_k(i)$  admixture to individual  $i$ .

In the case of selection in  $T$  post-admixture, we generalize equation (7) and set  $f_T(i)$  in (9) to:

$$f_T^P(i|s) = \frac{(1 + s)[\sum_{k=1}^K \alpha_k(i) f_k]}{1 + s[\sum_{k=1}^K \alpha_k(i) f_k]}. \quad (11)$$

For the alternative case of selection along the branches separating source  $A$  and its sampled surrogate  $A^*$ , we generalize equation (8) and replace  $f_T(i)$  in (9) with:

$$f_T^A(i|s_A) = \left[ \sum_{k \neq A}^K \alpha_A(i) f_k \right] + \alpha_A(i) \left[ \frac{(1 + s_A)f_A}{1 + s_A f_A} \right]. \quad (12)$$

In practice, we fix  $\alpha_A(i)$  to be the proportion of DNA that each target individual  $i$  matches to surrogate  $k$  as inferred by ADMIXTURE. We define:

$$L^P(s) \equiv \prod_{i=1}^M \left[ f_T^P(i|s)^{g_i} (1 - f_T^P(i|s))^{2-g_i} \right], \quad (13)$$

where  $g_i$  is the genotype for target individual  $i$ . We use the optim function in R with the ‘Nelder-Mead’ algorithm to find the maximum-likelihood estimate (MLE)  $\hat{s}$ , which is the value of  $s$  that maximizes equation (13).

Similarly we define:

$$L^A(s_A) \equiv \prod_{i=1}^M \left[ f_T^A(i|s_A)^{g_i} (1 - f_T^A(i|s_A))^{2-g_i} \right], \quad (14)$$

again finding  $\hat{s}_A$ , as the MLE for  $s_A$ .

We note that  $[2 - 2\log(L^P(\hat{s}))]$  and  $[2 - 2\log(L^A(\hat{s}_A))]$  are analogous to AIC values for these respective models. Following AIC theory, we calculate:

$$I = \frac{\min[L^P(\hat{s}), L^A(\hat{s}_A)]}{\max[L^P(\hat{s}), L^A(\hat{s}_A)]} \leq 1, \quad (15)$$

where, relative to the model with higher likelihood out of (13) and (14), the model with smaller likelihood is  $I$  times as probable to minimise the loss of information when used to represent the unknown true model (Akaike 1974).

Note we could analogously calculate the likelihood under the neutral model, i.e., using equation (10). Then, as an alternative to the selection testing approach described in Section ‘Testing for evidence of selection at a SNP’, we could use a likelihood-ratio-statistic approach to test for selection using either (13) or (14) as the alternative model likelihood. We explored this alternative testing approach, but do not use it here because it gave lower  $P$ -values when simulating under neutrality. This observation may in part be alleviated if we estimated  $f_{k^*}$  under both the neutral and alternative models rather than fixing  $f_{k^*} = f_k$ . However, estimating  $f_{k^*}$  is confounded with estimating  $s$  or  $s_A$  under the alternative models.

## 849 Simulations

850

### 851 *Estimating how well each surrogate reflects its corresponding true admixing source*

852 We aimed to generate simulations that mimic our real data. To do so, we first generate a measure of  
853 how well a sampled surrogate population  $k$  reflects its corresponding true (unknown) source  
854 population. In particular, we estimate a drift parameter  $d_k$  in the following manner. First, at each  
855 SNP  $j$  we use nlminb in R to find the estimated values  $\{\tilde{f}_1^j, \dots, \tilde{f}_K^j\}$  for  $\{f_1^*, \dots, f_K^*\}$ , respectively,  
856 that minimize:

$$\sum_{i=1}^M \left( x_i^j - \sum_{k=1}^K \alpha_k(i) f_k^* \right)^2, \quad (16)$$

857

858 Where  $x_i^j \in \{0,1,2\}$  is the allele count for the admixed target individual  $i \in [1, \dots, M]$  at the SNP  
859 and each  $\tilde{f}_k^j \in [0,1]$ . Then, for each source  $k$ , with observed allele counts  $G_k^j$  and total counts  $M_k^j$  at  
860 SNP  $j$  in the surrogate population, following Balding-Nichols (Balding and Nichols 1995) we  
861 assume:

862

$$G_k^j \text{Beta} \sim \text{Binomial} \left( M_k^j \frac{d_k}{1-d_k} \tilde{f}_k^j, \frac{d_k}{1-d_k} (1 - \tilde{f}_k^j) \right). \quad (17)$$

863

864 We then used the ‘Nelder-Mead’ algorithm in the optim function in R to find the  $d_k \in [0,1]$  that  
865 maximized the product of (17) across all SNPs. This gave the values reported in Table 1.

866

867 Large estimated  $d_k$  ( $>0.1$ ) correspond to cases where there is little admixture from that source in  
868 our sampled individuals from that country, i.e. for African admixture in most countries and Native  
869 American admixture in Brazil. As values inferred using such little data are presumably unreliable,  
870 we cap them at 0.05 for the simulations below. While these values are a guide, in practice we  
871 adjusted these values by a multiple of 2-7 to generate neutral simulations that had the same inferred  
872 drift  $\hat{D}$ , described in section ‘Testing for evidence of selection at a SNP’, as that observed in the real  
873 data.

874

875

| Target   | Native American | European | African |
|----------|-----------------|----------|---------|
| Brazil   | 0.173           | 0.007    | 0.102   |
| Chile    | 0.02            | 0.011    | 0.226   |
| Colombia | 0.044           | 0.012    | 0.044   |
| Mexico   | 0.024           | 0.007    | 0.223   |
| Peru     | 0.015           | 0.009    | 0.119   |

876 **Table 1.** Inferred  $d_k$  measuring how well the sampled surrogate (column) reflect the true admixing  
877 sources for each target population (row).

878

### 879 *Generating simulated allele frequencies*

880 We simulated admixed individuals who had experienced selection, with genome-wide admixture  
881 proportions  $\alpha_k(i)$  from source populations  $k \in [1, \dots, K]$  for simulated individuals  $i \in [1, \dots, M]$   
882 matching those inferred by ADMIXTURE in the real data. To do so, for each simulation we  
883 repeated the following procedure:

884

- 885 1. For each source  $k$ , at each SNP we sample starting allele frequencies  $f_{k^*}$  from a  
886  $Beta\left(\frac{d_k}{1-d_k}f_k, \frac{d_k}{1-d_k}(1-f_k)\right)$ , where  $f_k$  is the sampled frequency of the respective  
887 surrogate population and  $d_k$  are defined in Table 1 (but capped at 0.05).
- 888 2. We randomly select SNPs to undergo selection. If selection is occurring in source  
889 population  $k$  prior to admixture, we randomly sample from among SNPs for which  $f_{k^*} <$   
890 0.5. If selection is occurring post-admixture, we instead randomly sample from among  
891 SNPs for which  $\sum_{i=1}^M (\sum_{k=1}^K f_{k^*} \alpha_k(i))/M < 0.5$ .
- 892 3. We randomly select neutral SNPs from among all remaining SNPs, i.e., those not among  
893 the SNPs chosen in (2), in the real data.
- 894 4. To simulate selection:
  - 895 • If selection is occurring prior to admixture, we simulate selection in the relevant  
896 source population for  $g$  generations under a specified model of selection (additive,  
897 dominant, multiplicative, recessive) using Wright-Fisher with a population size of  
898  $N_e$  individuals.
  - 899 • If selection is occurring after admixture, we simulate selection separately in each of  
900 the source populations for  $g$  generations, under a specified model of selection using  
901 Wright-Fisher with a population size of  $N_e$  individuals per population.

5. At each SNP, we sample allele counts for each individual  $i$  from a  $Binomial(2, p_i)$  with  $p_i = \sum_{k=1}^K [f_k^g \alpha_k(i)]$ , where:
- $f_k^g = f_{k^*}$  for neutral SNPs
  - $f_k^g = f_{k^*}$  at selected SNPs for source populations  $k$  not undergoing selection (i.e., in cases where selection is pre-admixture)
  - $f_k^g$  is the sampled final frequencies in step (4) after  $g$  generations, at selected SNPs for source population  $k$  undergoing selection

We then analyse data from the simulated target population individuals using the real sampled data from the surrogate populations. For simulations here, we use  $N_e = 10000$  for the African, European, and Native American source groups.

Our procedure in steps (4)-(5) to simulate selection and admixture ensures the admixed individuals have variable admixture proportions while remaining computationally tractable. An alternative to this would be to generate  $M$  admixed populations using observed  $f_k$  values, with the admixture proportions for population  $i$  equal to  $\alpha_1(i), \dots, \alpha_K(i)$ , and then simulate each admixed population for  $g$  generations using Wright-Fisher, either with or without selection. Such simulations would match the approach used by our model to classify selection as type (i) or type (ii) (Section ‘Determining whether selection occurred pre- or post-admixture’). However, we chose the above for reasons of computational efficiency, as we have many individuals (i.e.,  $M > 1000$ ). Note also that our selection test (Section ‘Determining whether selection occurred pre- or post-admixture’) is different from this simulation procedure, in that our test models the combined allele frequency across all admixed individuals, using the mean admixture contributions across target individuals to calculate the expected frequency. This may explain why our model exhibits an excess of SNPs with small  $P$ -values even when simulating no selection. This is despite using all SNPs to infer our model’s variance parameter, which is designed to make more SNPs fit the model (likely explaining the excess of high  $P$ -values we also see, e.g., in supplementary fig. S14). While including this variance parameter does somewhat control  $P$ -values by e.g., giving a median  $P$ -value near 0.5, as expected under neutrality, our no-selection simulations suggest caution in directly using our model’s  $P$ -values for assessing selection evidence. This suggests some degree of plausible simulations would be helpful to calibrate the model’s reported  $P$ -values.

### **Local ancestry analysis**

Local ancestry assignment was conducted using the HMM approach implemented in ELAI (Guan

2014). The phased genotype data needed as input was obtained by using SHAPEIT2 (Delaneau et al. 2012) with default parameter settings. Genetic distances were obtained from the HapMap Phase II genetic map build GRCh37 (Gibbs et al. 2003). As reference continental panels, we used the same Native American, European, and African individuals as in our AdaptMix analysis. ELAI was run setting the admixture generation parameter to 20, and with 20 rounds of EM iterations. To obtain local ancestry assignment probabilities, we conducted 10 independent runs and averaged probabilities across all runs as recommended in the ELAI manual. To test for local ancestry deviations we estimated Z-scores for each ancestry across each locus, and obtained the corresponding one-sided *P*-values testing for a positive deviation.

### ***Population Branch Statistic (PBS) analysis***

We first selected Latin American individuals carrying a specific Native American ancestry component based on the inferred Native American ancestry proportions previously estimated by Chacon-Duque et al 2018 in the CANDELA sample. Specifically, for each Native American ancestry component, we selected CANDELA individuals with >10% inferred ancestry from that particular Native American ancestry component, and with <1% combined inferred ancestry combined across all other Native American components. Thus, each group of admixed Latin Americans was composed primarily of Native American ancestry from a particular Native American component, plus European and African ancestry. We then estimated allele frequencies for each Native American component by considering only alleles (i.e. haplotypes) that were considered of Native American origin with local-ancestry posterior probability >0.9. We only computed allele frequencies for a Native American component if all SNPs genome-wide had >100 alleles (haplotypes) assigned to Native American origin. This resulted in allele frequency estimates for six Native American components, including ‘Quechua’, ‘Andes Piedmont’, ‘Chibcha Paez’, ‘Nahua1’, ‘South Mexico’, and ‘Mapuche’ ancestral components (see Chacon-Duque et al. (2018) for a detail description of the inferred components). Pairwise  $F_{ST}$  were then estimated using Hudson’s estimator as in equation 9 of Bhatia et al. (2013). The branch length ( $T$ ) between two populations was computed as  $T = -\log_{10}(1 - F_{ST})$  (Cavalli-Sforza 1969). The Population Branch Statistic (PBS) (Yi et al. 2010) combines the pairwise branch lengths between three populations, which was computed as:

$$PBS_{Target} = \frac{T^{Target,Control} + T^{Target,Outgroup} + T^{Control,Outgroup}}{2}.$$

PBS values were computed for each Native American component, using all possible pairwise combinations of the other Native components as the control and outgroup populations. The rationale of this analysis was to try to find signals of selection exclusive to a given Native American group

(i.e. that likely occurred after the divergence between Native American lineages). For some of our analysis we also used the CHB population from the 1000 Genomes Project, the European reference population, or the African reference population, as control and outgroup populations.

### ***Summary statistics for GWAS and eQTL data***

To assess the biological consequence of selected variants, we queried summary statistics from GWASs of relevant phenotypes, and gene-expression data (i.e expression quantitative locus [eQTL] studies) from relevant cell or tissues. For our GWAS query, we retrieved data from immune and metabolic-related phenotypes, as these traits are known to have been subjected to strong selective pressures across several human groups (Fan et al. 2016). Immune-related phenotypes included (i) total white cell count, neutrophil count, lymphocyte count, monocyte count, basophil count, and eosinophil count from the Chen et al. (2020) GWAS study conducted across five continental ancestry groups. Metabolic-related phenotypes included body mass index (BMI), body fat percentage, type II diabetes status, hip circumference, waist circumference, HDL levels, LDL levels, cholesterol levels, and triglycerides levels (Loh et al. 2018). Summary statistics from these GWAS analyses were based on the UK BioBank cohort available at: <http://www.nealelab.is/uk-biobank>. For our eQTL query, we retrieved cis-associations summary statistics of 15 human immune cell types from the DICE (Database of Immune Cell Expression, Expression quantitative trait loci [eQTLs] and Epigenomics) project (Schmiedel et al. 2018), available at: <https://dice-database.org/downloads>. We also retrieved cis-association summary statistics from adipose (subcutaneous, and visceral omentum), muscle (skeletal), and liver tissue from the GTEx Project v7 (Lonsdale et al. 2013) available at: <https://gtexportal.org/home/datasets>.

### **Acknowledgements**

We thank the volunteers for their enthusiastic support for this research. We also thank Alvaro Alvarado, Mónica Ballesteros Romero, Ricardo Cebrecos, Miguel Ángel Contreras Sieck, Francisco de Ávila Becerril, Joyce De la Piedra, María Teresa Del Solar, Paola Everardo Martínez, William Flores, Martha Granados Riveros, Rosilene Paim, Ricardo Gunski, Sergeant João Felisberto Menezes Cavalheiro, Major Eugênio Correa de Souza Junior, Wendy Hart, Ilich Jafet Moreno, Paola León-Mimila, Francisco Quispealaya, Diana Rogel Diaz, Ruth Rojas, and Vanessa Sarabia, for assistance with volunteer recruitment, sample processing and data entry. We also thank Francois Balloux, Aida Andres, Mark McCarthy, and Etienne Patin for helpful discussion and critical comments on earlier versions of the manuscript. We are very grateful to the institutions that allowed the use of their facilities for the assessment of volunteers, including: Escuela Nacional de

Antropología e Historia and Universidad Nacional Autónoma de México (México); Universidade Federal do Rio Grande do Sul (Brazil); 13° Companhia de Comunicações Mecanizada do Exército Brasileiro (Brazil); Pontificia Universidad Católica del Perú, Universidad de Lima and Universidad Nacional Mayor de San Marcos (Perú). Work leading to this publication received funded from: the National Natural Science Foundation of China (#31771393 to ARL), the Scientific and Technology Committee of Shanghai Municipality (18490750300 to ARL), Ministry of Science and Technology of China (2020YFE0201600 to ARL), Shanghai Municipal Science and Technology Major Project (2017SHZDZX01 to ARL) and the 111 Project (B13016 to ARL), the Leverhulme Trust (F/07134/DF to ARL), BBSRC (BB/I021213/1 to ARL), the Excellence Initiative of Aix-Marseille University - A\*MIDEX (a French “Investissements d’Avenir” programme to ARL), Wellcome Trust/Royal Society (098386/Z/12/Z to GH), the National Institute for Health Research University College London Hospitals Biomedical Research Centre, BBSRC (BB/R01356X/1), Universidad de Antioquia (CODI sostenibilidad de grupos 2013- 2014 and MASO 2013-2014), Conselho Nacional de Desenvolvimento Científico e Tecnológico, Fundação de Amparo à Pesquisa do Estado do Rio Grande do Sul (Apoio a Núcleos de Excelência Program) and Fundação de Aperfeiçoamento de Pessoal de Nível Superior. JM-R was supported by a doctoral scholarship from CONCYTEC-PERU (224-2014-FONDECYT).

#### **Data availability**

This project only analyses data that has been previously reported in other publications. Raw genotype data for reference populations can be accessed as described previously (The 1000 Genomes Project Consortium 2015; Chacon-Duque et al. 2018). Raw genotype data from CANDELA cannot be made available due to restrictions imposed by ethical approval. Summary statistics from the selection analysis will be deposited in a public repository upon publication.

#### **Software availability**

Scripts for selection analyses will be uploaded to a software developer public repository upon publication. The current version of AdaptMix presented in this study is available upon request from [g.hellenthal@ucl.ac.uk](mailto:g.hellenthal@ucl.ac.uk).

# Main Figure legends

**Fig. 1. Schematic and intuition of the AdaptMix model. (a)** For each CANDELA individual (columns), ADMIXTURE-inferred proportions of ancestry related to Native American, European, and African reference individuals. **(b)** Assuming only two admixing sources in this illustration for simplicity, the model assumes ancestral populations ( $K'_1$  and  $K'_2$ ) contribute ancestry proportions  $\alpha_{K_1}$  and  $\alpha_{K_2}$ , respectively, to an admixed population ( $X'$ ) that is ancestral to the tested population ( $X$ ). Assuming neutrality, the expected allele frequency ( $p_0$ ) of  $X'$  is estimated using these proportions and the allele frequencies surrogate populations  $K_1$  and  $K_2$  related to  $K'_1$  and  $K'_2$ , respectively. The sampled allele frequency ( $p$ ) of  $X$  is compared to  $p_0$ , with large deviations indicative of selection (shown with an asterisk in the distribution). **(c and d)** The relationship between  $p_0$ , the expected allele frequency in the admixed population under neutrality or selection, and  $\alpha_{K_2}$ , the ancestry proportion contributed from ancestral population  $K'_2$ . If selection occurred prior to admixture during the split between populations  $K'_2$  and its surrogate  $K_2$  (i.e. along the blue branch in **[a]**), this relationship increases linearly (blue lines), becoming more differentiated from neutrality (grey line) as the admixture from  $K'_2$  increases. In contrast, under selection post-admixture (i.e. along the purple branch in **a]**), the expected allele frequency (purple lines) can deviate from neutrality even when the admixture from  $K'_2$  is near 0. The difference between the post-admixture and pre-admixture lines is more clear when allele frequencies in populations  $K_1$  and  $K_2$  are similar (top plot). Solid blue and red lines indicate the allele frequencies in the surrogate populations  $K_1$  and  $K_2$ , which are used to calculate  $p_0$ .

**Fig 2. Performance of AdaptMix to detect and classify selection in simulated Latin American populations. (a)** Power to detect selection post-admixture, selection in Native Americans, or selection in Europeans in simulated populations mimicking the Latin American cohorts. Power is based on a  $P$ -value cutoff that resulted in a false-positive rate of  $5 \times 10^{-5}$  in neutral simulations. The power estimated for a given selection coefficient is based on combining simulations using four different modes of selection (additive, dominant, multiplicative, recessive) over 12 generations for the post-admixture simulations, over 50 generations for the selection in Native American simulations, and over 25 generations for the selection in European simulations. Each simulation for a given combination of parameters consisted of 10,000 advantageous SNPs with a pre-selection minor allele frequency lower than 0.5. **(b)** The proportion of significant SNPs from (a) that were assigned to the correct simulated scenario of (left-to-right) post-admixture selection or selection in Native Americans or Europeans (using a likelihood ratio  $> 1,000$  to make a call; otherwise 'Unclassified'). Rows give the true selection coefficient (legend at right), and the heatmap values

give the classification rate. Rows with N.A. shows instances with less than 50 selected SNPs for which the classification rate is not shown.

**Fig. 3. Genome-wide selection scan in five Latin American cohorts.** Manhattan plot showing the genomic regions identified as selected via AdaptMix in each Latin American cohort. The dashed horizontal lines indicate the  $P$ -values cutoffs corresponding to a false-positive rate of  $5 \times 10^{-5}$  based on neutral simulations. Different shapes represent the most likely selection model. Names of genes associated with significant SNPs are shown.

**Fig 4. Regional selection plot at the HLA region in five Latin American cohorts.** The top plot shows the  $-\log_{10}(P\text{-values})$  of SNPs from AdaptMix, the middle plot shows  $Z$ -score values based on African local ancestry deviations, and the bottom plot shows genes in the region shaded in grey. Genomic coordinates are in Mb (build hg19 as reference) and genes shown include transcripts.

**Fig. 5. Genetic loci with signals of selection at immune-related genes. (a), (b) and (c)** Regional selection plot at three candidate regions of selection encompassing two immune-related genes in the Chilean and one immune-related gene in the Peruvian cohort, respectively. Each plot is composed of four panels (rows), consisting of  $-\log_{10}(P\text{-values})$  of SNPs: (row 1) from AdaptMix; (row 2) associated with immune-related cell counts via GWAS (Chen et al 2020); (row 3) associated (as expression quantitative trait loci [eQTLs]) with expression of genes *CD101*, *PTPN2* and *MIF* for (a)-(c), respectively (Schmiedel et al. 2018); with (row 4) depicting genes in the region (in Mb, build hg19 as reference). Horizontal dashed lines give significance thresholds of (row 1)  $P\text{-value} = 1 \times 10^{-5}$  based on neutral simulations (row 2)  $P\text{-value} = 1 \times 10^{-5}$  (blue line) and  $P\text{-value} = 5 \times 10^{-8}$  (red line), and (row 3)  $P\text{-value} = 1 \times 10^{-4}$ . **(d), (e) and (f)** Derived allele frequency (DAF) in admixed Latin Americans (white circles) stratified by proportion of inferred Native American ancestry, for the SNPs highlighted (vertical dashed line) in top row panels. The sizes of the circles are proportional to the number of individuals in that particular bin. Lines give expected DAF under neutrality (grey), post-admixture selection (brown) or selection in the Native source (black). Horizontal dashed red, blue, and green lines depict DAF for surrogates to Native American, European, and African sources, respectively.

**Fig. 6. Genetic loci with signals of selection at metabolic-related genes. (a) and (b)** Regional selection plot at two candidate regions of selection encompassing metabolic-related genes in the Mexican and Peruvian cohorts, respectively. Each plot is composed of four panels consisting of  $-\log_{10}(P\text{-values})$  of SNPs: (row 1) from AdaptMix; (row 2) from the UK Biobank GWAS; (row 3)

1107 associated (as eQTLs) with expression of *BRINP3* and *HKDC1* for (a)-(b), respectively, (GTEx  
1108 eQTL study); with (row 4) depicting genes in the region (in Mb, build hg19 as reference).  
1109 Horizontal dashed lines give significance thresholds of (row 1)  $P$ -value =  $1 \times 10^{-5}$  based on neutral  
1110 simulations (row 2)  $P$ -value =  $1 \times 10^{-5}$  (blue line) and  $P$ -value =  $5 \times 10^{-8}$  (red line), and (row 3)  $P$ -  
1111 value =  $1 \times 10^{-4}$ . **(c)** and **(d)** Derived allele frequency (DAF) in admixed Latin Americans (white  
1112 circles) stratified by proportion of inferred Native American ancestry, for the SNPs highlighted  
1113 (vertical dashed line) in top row panels. The sizes of the circles are proportional to the number of  
1114 individuals in that particular bin. Lines give expected DAF under neutrality (grey), post-admixture  
1115 selection (brown) or selection in the Native American source (black). Horizontal dashed red, blue,  
1116 and green lines depict DAF for surrogates to Native American, European, and African sources,  
1117 respectively.  
1118

# References

- Acuña-Alonzo V, Flores-Dorantes T, Kruit JK, Villarreal-Molina T, Arellano-Campos O, Hünemeier T, Moreno-Estrada A, Ortiz-López MG, Villamil-Ramírez H, León-Mimila P. 2010. A functional ABCA1 gene variant is associated with low HDL-cholesterol levels and shows evidence of positive selection in Native Americans. *Human molecular genetics* 19:2877-2885.
- Akaike H. 1974. A new look at the statistical model identification. *IEEE transactions on automatic control* 19:716-723.
- Alexander DH, Novembre J, Lange K. 2009. Fast model-based estimation of ancestry in unrelated individuals. *Genome Res* 19:1655-1664.
- Amorim CE, Nunes K, Meyer D, Comas D, Bortolini MC, Salzano FM, Hunemeier T. 2017. Genetic signature of natural selection in first Americans. *Proc Natl Acad Sci U S A* 114:2195-2199.
- Avila-Arcos MC, McManus KF, Sandoval K, Rodriguez-Rodriguez JE, Villa-Islas V, Martin AR, Luisi P, Penaloza-Espinosa RI, Eng C, Huntsman S, et al. 2020. Population History and Gene Divergence in Native Mexicans Inferred from 76 Human Exomes. *Mol Biol Evol* 37:994-1006.
- Badillo Rivera KM, Nieves-Colón MA, Mendoza KS, Davalos VV, Lencinas LEE, Chen JW, Zhang ET, Sockell A, Tello PO, Hurtado GM. 2021. Clotting factor genes are associated with preeclampsia in high altitude pregnant women in the Peruvian Andes. *medRxiv*.
- Balding DJ, Nichols RA. 1995. A method for quantifying differentiation between populations at multi-allelic loci and its implications for investigating identity and paternity. *Genetica* 96:3-12.
- Basu A, Tang H, Zhu X, Gu CC, Hanis C, Boerwinkle E, Risch N. 2008. Genome-wide distribution of ancestry in Mexican Americans. *Hum Genet* 124:207-214.
- Bersaglieri T, Sabeti PC, Patterson N, Vanderploeg T, Schaffner SF, Drake JA, Rhodes M, Reich DE, Hirschhorn JN. 2004. Genetic signatures of strong recent positive selection at the lactase gene. *Am J Hum Genet* 74:1111-1120.
- Bhatia G, Patterson N, Sankararaman S, Price AL. 2013. Estimating and interpreting FST: the impact of rare variants. *Genome research* 23:1514-1521.
- Bhatia G, Tandon A, Patterson N, Aldrich MC, Ambrosone CB, Amos C, Bandera EV, Berndt SI, Bernstein L, Blot WJ. 2014. Genome-wide scan of 29,141 African Americans finds no evidence of directional selection since admixture. *The American Journal of Human Genetics* 95:437-444.
- Borrego F. 2013. The CD300 molecules: an emerging family of regulators of the immune system. *Blood, The Journal of the American Society of Hematology* 121:1951-1960.
- Bouloc A, Bagot M, Delaire S, Bensussan A, Boumsell L. 2000. Triggering CD101 molecule on human cutaneous dendritic cells inhibits T cell proliferation via IL-10 production. *European journal of immunology* 30:3132-3139.
- Calandra T, Roger T. 2003. Macrophage migration inhibitory factor: a regulator of innate immunity. *Nature Reviews Immunology* 3:791-800.
- Cavalli-Sforza LL editor.; 1969.
- Chacon-Duque JC, Adhikari K, Fuentes-Guajardo M, Mendoza-Revilla J, Acuna-Alonzo V, Barquera R, Quinto-Sanchez M, Gomez-Valdes J, Everardo Martinez P, Villamil-Ramirez H, et al. 2018. Latin Americans show wide-spread Converso ancestry and imprint of local Native ancestry on physical appearance. *Nat Commun* 9:5388.
- Chang CC, Chow CC, Tellier LC, Vattikuti S, Purcell SM, Lee JJ. 2015. Second-generation PLINK: rising to the challenge of larger and richer datasets. *Gigascience* 4:s13742-13015-10047-13748.
- Chen M-H, Raffield LM, Mousas A, Sakaue S, Huffman JE, Moscati A, Trivedi B, Jiang T, Akbari P, Vuckovic D. 2020. Trans-ethnic and ancestry-specific blood-cell genetics in 746,667 individuals from 5 global populations. *Cell* 182:1198-1213. e1114.
- Cheng JY, Stern AJ, Racimo F, Nielsen R. 2021. Detecting selection in multiple populations by modelling ancestral admixture components. *Mol Biol Evol*.
- Consortium TGP. 2015. A global reference for human genetic variation. *Nature* 526:68.
- Delaneau O, Marchini J, Zagury J-F. 2012. A linear complexity phasing method for thousands of genomes. *Nature methods* 9:179-181.

1171 Deng L, Ruiz-Linares A, Xu S, Wang S. 2016. Ancestry variation and footprints of natural selection  
1172 along the genome in Latin American populations. *Sci Rep* 6:21766.

1173 Ettinger NA, Duggal P, Braz RF, Nascimento ET, Beaty TH, Jeronimo SM, Pearson RD, Blackwell  
1174 JM, Moreno L, Wilson ME. 2009. Genetic admixture in Brazilians exposed to infection with  
1175 *Leishmania chagasi*. *Ann Hum Genet* 73:304-313.

1176 Fan S, Hansen ME, Lo Y, Tishkoff SA. 2016. Going global by adapting local: A review of recent  
1177 human adaptation. *Science* 354:54-59.

1178 Galinsky KJ, Bhatia G, Loh PR, Georgiev S, Mukherjee S, Patterson NJ, Price AL. 2016. Fast  
1179 Principal-Component Analysis Reveals Convergent Evolution of ADH1B in Europe and East Asia.  
1180 *Am J Hum Genet* 98:456-472.

1181 Ghoussaini M, Mountjoy E, Carmona M, Peat G, Schmidt EM, Hercules A, Fumis L, Miranda A,  
1182 Carvalho-Silva D, Buniello A. 2021. Open Targets Genetics: systematic identification of trait-  
1183 associated genes using large-scale genetics and functional genomics. *Nucleic acids research*  
1184 49:D1311-D1320.

1185 Gibbs RA, Belmont JW, Hardenbol P, Willis TD, Yu F, Yang H, Ch'ang L-Y, Huang W, Liu B,  
1186 Shen Y. 2003. The international HapMap project.

1187 Giri A, Hellwege JN, Keaton JM, Park J, Qiu C, Warren HR, Torstenson ES, Kovesdy CP, Sun YV,  
1188 Wilson OD. 2019. Trans-ethnic association study of blood pressure determinants in over 750,000  
1189 individuals. *Nature genetics* 51:51-62.

1190 Gu S, Li H, Pakstis AJ, Speed WC, Gurwitz D, Kidd JR, Kidd KK. 2018. Recent Selection on a  
1191 Class I ADH Locus Distinguishes Southwest Asian Populations Including Ashkenazi Jews. *Genes*  
1192 (Basel) 9.

1193 Guan Y. 2014. Detecting structure of haplotypes and local ancestry. *Genetics* 196:625-642.

1194 Guo C, Ludvik AE, Arlotto ME, Hayes MG, Armstrong LL, Scholtens DM, Brown CD, Newgard  
1195 CB, Becker TC, Layden BT. 2015. Coordinated regulatory variation associated with gestational  
1196 hyperglycaemia regulates expression of the novel hexokinase HKDC1. *Nature communications* 6:1-  
1197 8.

1198 Hamid I, Korunes KL, Beleza S, Goldberg A. 2021. Rapid adaptation to malaria facilitated by  
1199 admixture in the human population of Cabo Verde. *Elife* 10.

1200 Hancock AM, Witonsky DB, Ehler E, Alkorta-Aranburu G, Beall C, Gebremedhin A, Sukernik R,  
1201 Utermann G, Pritchard J, Coop G. 2010. Human adaptations to diet, subsistence, and ecoregion are  
1202 due to subtle shifts in allele frequency. *Proceedings of the National Academy of Sciences* 107:8924-  
1203 8930.

1204 Harris DN, Ruczinski I, Yanek LR, Becker LC, Becker DM, Guio H, Cui T, Chilton FH, Mathias  
1205 RA, O'Connor TD. 2019. Evolution of hominin polyunsaturated fatty acid metabolism: from Africa  
1206 to the New World. *Genome biology and evolution* 11:1417-1430.

1207 Hayes MG, Urbanek M, Hivert M-F, Armstrong LL, Morrison J, Guo C, Lowe LP, Scheftner DA,  
1208 Pluzhnikov A, Levine DM. 2013. Identification of HKDC1 and BACE2 as genes influencing  
1209 glycemic traits during pregnancy through genome-wide association studies. *Diabetes* 62:3282-3291.

1210 Hellenthal G, Busby GBJ, Band G, Wilson JF, Capelli C, Falush D, Myers S. 2014. A genetic atlas  
1211 of human admixture history. *Science* 343:747-751.

1212 Hodgson JA, Pickrell JK, Pearson LN, Quillen EE, Prista A, Rocha J, Soodyall H, Shriver MD,  
1213 Perry GH. 2014. Natural selection for the Duffy-null allele in the recently admixed people of  
1214 Madagascar. *Proc Biol Sci* 281:20140930.

1215 Hoffmann TJ, Ehret GB, Nandakumar P, Ranatunga D, Schaefer C, Kwok P-Y, Iribarren C,  
1216 Chakravarti A, Risch N. 2017. Genome-wide association analyses using electronic health records  
1217 identify new loci influencing blood pressure variation. *Nature genetics* 49:54-64.

1218 Homburger JR, Moreno-Estrada A, Gignoux CR, Nelson D, Sanchez E, Ortiz-Tello P, Pons-Estel  
1219 BA, Acevedo-Vasquez E, Miranda P, Langefeld CD, et al. 2015. Genomic Insights into the  
1220 Ancestry and Demographic History of South America. *PLoS Genet* 11:e1005602.

1221 Joffe GM, Esterlitz JR, Levine RJ, Clemens JD, Ewell MG, Sibai BM, Catalano PM. 1998. The  
1222 relationship between abnormal glucose tolerance and hypertensive disorders of pregnancy in  
1223 healthy nulliparous women. *American journal of obstetrics and gynecology* 179:1032-1037.  
1224 Kanthimathi S, Liju S, Laasya D, Anjana RM, Mohan V, Radha V. 2016. Hexokinase domain  
1225 containing 1 (HKDC1) gene variants and their association with gestational diabetes mellitus in a  
1226 south indian population. *Annals of human genetics* 80:241-245.  
1227 Karlsson EK, Kwiatkowski DP, Sabeti PC. 2014. Natural selection and infectious disease in human  
1228 populations. *Nature Reviews Genetics* 15:379-393.  
1229 Kominsky DJ, Campbell EL, Colgan SP. 2010. Metabolic shifts in immunity and inflammation.  
1230 *The Journal of Immunology* 184:4062-4068.  
1231 Koscielny G, An P, Carvalho-Silva D, Cham JA, Fumis L, Gasparyan R, Hasan S, Karamanis N,  
1232 Maguire M, Papa E. 2017. Open Targets: a platform for therapeutic target identification and  
1233 validation. *Nucleic acids research* 45:D985-D994.  
1234 Lazaridis I, Patterson N, Mittnik A, Renaud G, Mallick S, Kirsanow K, Sudmant PH, Schraiber JG,  
1235 Castellano S, Lipson M, et al. 2014. Ancient human genomes suggest three ancestral populations  
1236 for present-day Europeans. *Nature* 513:409-413.  
1237 Lindo J, Haas R, Hofman C, Apata M, Moraga M, Verdugo RA, Watson JT, Llave CV, Witonsky  
1238 D, Beall C. 2018. The genetic prehistory of the Andean highlands 7000 years BP though European  
1239 contact. *Science advances* 4:eaau4921.  
1240 Loh PR, Kichaev G, Gazal S, Schoech AP, Price AL. 2018. Mixed-model association for biobank-  
1241 scale datasets. *Nat Genet* 50:906-908.  
1242 Long JC. 1991. The genetic structure of admixed populations. *Genetics* 127:417-428.  
1243 Lonsdale J, Thomas J, Salvatore M, Phillips R, Lo E, Shad S, Hasz R, Walters G, Garcia F, Young  
1244 N. 2013. The genotype-tissue expression (GTEx) project. *Nature genetics* 45:580-585.  
1245 Ludvik AE, Pusec CM, Priyadarshini M, Angueira AR, Guo C, Lo A, Hershenhouse KS, Yang G-  
1246 Y, Ding X, Reddy TE. 2016. HKDC1 is a novel hexokinase involved in whole-body glucose use.  
1247 *Endocrinology* 157:3452-3461.  
1248 Luisi P, García A, Berros JM, Motti JM, Demarchi DA, Alfaro E, Aquilano E, Argüelles C, Avena  
1249 S, Bailliet G. 2020. Fine-scale genomic analyses of admixed individuals reveal unrecognized  
1250 genetic ancestry components in Argentina. *PloS one* 15:e0233808.  
1251 Lumeng CN, Saltiel AR. 2011. Inflammatory links between obesity and metabolic disease. *The*  
1252 *Journal of clinical investigation* 121:2111-2117.  
1253 Mathieson I. 2020. Limited evidence for selection at the FADS locus in Native American  
1254 populations. *Molecular biology and evolution* 37:2029-2033.  
1255 Mathieson I, Lazaridis I, Rohland N, Mallick S, Patterson N, Roodenberg SA, Harney E,  
1256 Stewardson K, Fernandes D, Novak M, et al. 2015. Genome-wide patterns of selection in 230  
1257 ancient Eurasians. *Nature* 528:499-503.  
1258 Moreno-Estrada A, Gignoux CR, Fernandez-Lopez JC, Zakharia F, Sikora M, Contreras AV,  
1259 Acuna-Alonzo V, Sandoval K, Eng C, Romero-Hidalgo S, et al. 2014. Human genetics. The  
1260 genetics of Mexico recapitulates Native American substructure and affects biomedical traits.  
1261 *Science* 344:1280-1285.  
1262 Moreno-Estrada A, Gravel S, Zakharia F, McCauley JL, Byrnes JK, Gignoux CR, Ortiz-Tello PA,  
1263 Martinez RJ, Hedges DJ, Morris RW, et al. 2013. Reconstructing the population genetic history of  
1264 the Caribbean. *PLoS Genet* 9:e1003925.  
1265 Norris ET, Rishishwar L, Chande AT, Conley AB, Ye K, Valderrama-Aguirre A, Jordan IK. 2020.  
1266 Admixture-enabled selection for rapid adaptive evolution in the Americas. *Genome Biol* 21:29.  
1267 Osuna-Ramos JF, Reyes-Ruiz JM, Del Ángel RM. 2018. The role of host cholesterol during  
1268 flavivirus infection. *Frontiers in cellular and infection microbiology* 8:388.  
1269 Pasaniuc B, Sankararaman S, Torgerson DG, Gignoux C, Zaitlen N, Eng C, Rodriguez-Cintron W,  
1270 Chapela R, Ford JG, Avila PC. 2013. Analysis of Latino populations from GALA and MEC studies  
1271 reveals genomic loci with biased local ancestry estimation. *Bioinformatics* 29:1407-1415.

1272 Patterson N, Moorjani P, Luo Y, Mallick S, Rohland N, Zhan Y, Genschoreck T, Webster T, Reich  
1273 D. 2012. Ancient admixture in human history. *Genetics* 192:1065-1093.

1274 Pickup J, Crook M. 1998. Is type II diabetes mellitus a disease of the innate immune system?  
1275 *Diabetologia* 41:1241-1248.

1276 Pierron D, Heiske M, Razafindrazaka H, Pereda-Loth V, Sanchez J, Alva O, Arachiche A, Boland  
1277 A, Olaso R, Deleuze JF, et al. 2018. Strong selection during the last millennium for African  
1278 ancestry in the admixed population of Madagascar. *Nat Commun* 9:932.

1279 Poulter M, Hollox E, Harvey CB, Mulcare C, Peuhkuri K, Kajander K, Sarner M, Korpela R,  
1280 Swallow DM. 2003. The causal element for the lactase persistence/non-persistence polymorphism  
1281 is located in a 1 Mb region of linkage disequilibrium in Europeans. *Ann Hum Genet* 67:298-311.

1282 Pulit SL, Stoneman C, Morris AP, Wood AR, Glastonbury CA, Tyrrell J, Yengo L, Ferreira T,  
1283 Marouli E, Ji Y. 2019. Meta-analysis of genome-wide association studies for body fat distribution  
1284 in 694 649 individuals of European ancestry. *Human molecular genetics* 28:166-174.

1285 Racimo F, Gokhman D, Fumagalli M, Ko A, Hansen T, Moltke I, Albrechtsen A, Carmel L,  
1286 Huerta-Sánchez E, Nielsen R. 2017. Archaic adaptive introgression in TBX15/WARS2. *Molecular  
1287 biology and evolution* 34:509-524.

1288 Reynolds AW, Mata-Miguez J, Miro-Herrans A, Briggs-Cloud M, Sylestine A, Barajas-Olmos F,  
1289 Garcia-Ortiz H, Rzhetskaya M, Orozco L, Raff JA, et al. 2019. Comparing signals of natural  
1290 selection between three Indigenous North American populations. *Proc Natl Acad Sci U S A*  
1291 116:9312-9317.

1292 Rishishwar L, Conley AB, Wigington CH, Wang L, Valderrama-Aguirre A, Jordan IK. 2015.  
1293 Ancestry, admixture and fitness in Colombian genomes. *Sci Rep* 5:12376.

1294 Robbins GR, Wen H, Ting JP-Y. 2014. Inflammasomes and metabolic disorders: old genes in  
1295 modern diseases. *Molecular cell* 54:297-308.

1296 Ruiz-Linares A, Adhikari K, Acuna-Alonzo V, Quinto-Sanchez M, Jaramillo C, Arias W, Fuentes  
1297 M, Pizarro M, Everardo P, de Avila F, et al. 2014. Admixture in Latin America: geographic  
1298 structure, phenotypic diversity and self-perception of ancestry based on 7,342 individuals. *PLoS  
1299 Genet* 10:e1004572.

1300 Rumold CU, Aldenderfer MS. 2016. Late Archaic–Early Formative period microbotanical evidence  
1301 for potato at Jiskairumoko in the Titicaca Basin of southern Peru. *Proceedings of the National  
1302 Academy of Sciences* 113:13672-13677.

1303 Santoscoy-Ascencio G, Baños-Hernández CJ, Navarro-Zarza JE, Hernández-Bello J, Bucala R,  
1304 López-Quintero A, Valdés-Alvarado E, Parra-Rojas I, Illades-Aguir B, Muñoz-Valle JF. 2020.  
1305 Macrophage migration inhibitory factor promoter polymorphisms are associated with disease  
1306 activity in rheumatoid arthritis patients from Southern Mexico. *Molecular genetics & genomic  
1307 medicine* 8:e1037.

1308 Schmiedel BJ, Singh D, Madrigal A, Valdovino-Gonzalez AG, White BM, Zapardiel-Gonzalo J, Ha  
1309 B, Altay G, Greenbaum JA, McVicker G. 2018. Impact of genetic polymorphisms on human  
1310 immune cell gene expression. *Cell* 175:1701-1715. e1716.

1311 Shuai K, Liu B. 2003. Regulation of JAK–STAT signalling in the immune system. *Nature Reviews  
1312 Immunology* 3:900-911.

1313 Sibai BM. 2003. Diagnosis and management of gestational hypertension and preeclampsia.  
1314 *Obstetrics & Gynecology* 102:181-192.

1315 Sirugo G, Williams SM, Tishkoff SA. 2019. The Missing Diversity in Human Genetic Studies. *Cell*  
1316 177:1080.

1317 Soares LR, Tsavaler L, Rivas A, Engleman EG. 1998. V7 (CD101) ligation inhibits TCR/CD3-  
1318 induced IL-2 production by blocking Ca<sup>2+</sup> flux and nuclear factor of activated T cell nuclear  
1319 translocation. *The Journal of Immunology* 161:209-217.

1320 Tan Y-X, Hu S-M, You Y-P, Yang G-L, Wang W. 2019. Replication of previous genome-wide  
1321 association studies of HKDC1, BACE2, SLC16A11 and TMEM163 SNPs in a gestational diabetes  
1322 mellitus case–control sample from Han Chinese population. *Diabetes, metabolic syndrome and  
1323 obesity: targets and therapy* 12:983.

1324 Tang H, Choudhry S, Mei R, Morgan M, Rodriguez-Cintron W, Burchard EG, Risch NJ. 2007.  
1325 Recent genetic selection in the ancestral admixture of Puerto Ricans. *Am J Hum Genet* 81:626-633.  
1326 Van Dijk M, Mulders J, Poutsma A, Konst AA, Lachmeijer AM, Dekker GA, Blankenstein MA,  
1327 Oudejans CB. 2005. Maternal segregation of the Dutch preeclampsia locus at 10q22 with a new  
1328 member of the winged helix gene family. *Nature genetics* 37:514-519.  
1329 van Dijk M, Oudejans C. 2011. STOX1: key player in trophoblast dysfunction underlying early  
1330 onset preeclampsia with growth retardation. *Journal of pregnancy* 2011.  
1331 Vicente M, Priehodova E, Diallo I, Podgorna E, Poloni ES, Cerny V, Schlebusch CM. 2019.  
1332 Population history and genetic adaptation of the Fulani nomads: inferences from genome-wide data  
1333 and the lactase persistence trait. *BMC Genomics* 20:915.  
1334 Vicuna L, Klimenkova O, Norambuena T, Martinez FI, Fernandez MI, Shchur V, Eyheramendy S.  
1335 2020. Postadmixture Selection on Chileans Targets Haplotype Involved in Pigmentation,  
1336 Thermogenesis and Immune Defense against Pathogens. *Genome Biol Evol* 12:1459-1470.  
1337 Villarreal-Molina MT, Flores-Dorantes MT, Arellano-Campos O, Villalobos-Comparan M,  
1338 Rodríguez-Cruz M, Miliar-García A, Huertas-Vazquez A, Menjivar M, Romero-Hidalgo S, Wachter  
1339 NH. 2008. Association of the ATP-binding cassette transporter A1 R230C variant with early-onset  
1340 type 2 diabetes in a Mexican population. *Diabetes* 57:509-513.  
1341 Wang S, Lewis CM, Jakobsson M, Ramachandran S, Ray N, Bedoya G, Rojas W, Parra MV,  
1342 Molina JA, Gallo C, et al. 2007. Genetic variation and population structure in native Americans.  
1343 *PLoS Genet* 3:e185.  
1344 Warren HR, Evangelou E, Cabrera CP, Gao H, Ren M, Mifsud B, Ntalla I, Surendran P, Liu C,  
1345 Cook JP. 2017. Genome-wide association analysis identifies novel blood pressure loci and offers  
1346 biological insights into cardiovascular risk. *Nature genetics* 49:403-415.  
1347 Warrington NM, Beaumont RN, Horikoshi M, Day FR, Helgeland Ø, Laurin C, Bacelis J, Peng S,  
1348 Hao K, Feenstra B. 2019. Maternal and fetal genetic effects on birth weight and their relevance to  
1349 cardio-metabolic risk factors. *Nature genetics* 51:804-814.  
1350 Weissgerber TL, Mudd LM. 2015. Preeclampsia and diabetes. *Current diabetes reports* 15:1-10.  
1351 Yi X, Liang Y, Huerta-Sanchez E, Jin X, Cuo ZXP, Pool JE, Xu X, Jiang H, Vinckenbosch N,  
1352 Korneliussen TS. 2010. Sequencing of 50 human exomes reveals adaptation to high altitude.  
1353 *Science* 329:75-78.  
1354 Zamudio S. 2007. High-altitude hypoxia and preeclampsia. *Frontiers in bioscience: a journal and*  
1355 *virtual library* 12:2967.  
1356 Zhou Q, Zhao L, Guan Y. 2016. Strong selection at MHC in Mexicans since admixture. *PLoS*  
1357 *genetics* 12:e1005847.  
1358 Zhu Z, Guo Y, Shi H, Liu C-L, Panganiban RA, Chung W, O'Connor LJ, Himes BE, Gazal S,  
1359 Hasegawa K. 2020. Shared genetic and experimental links between obesity-related traits and asthma  
1360 subtypes in UK Biobank. *Journal of Allergy and Clinical Immunology* 145:537-549.  
1361

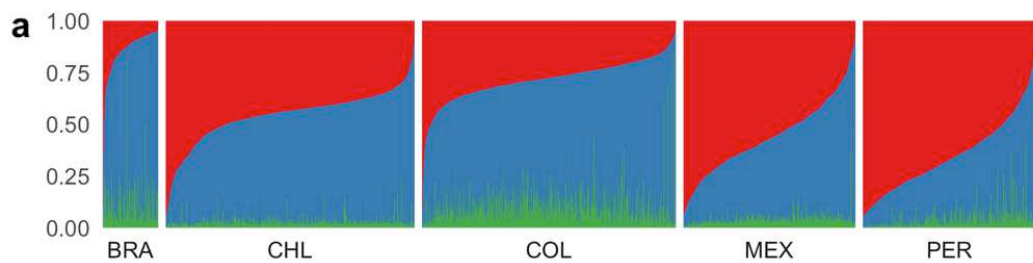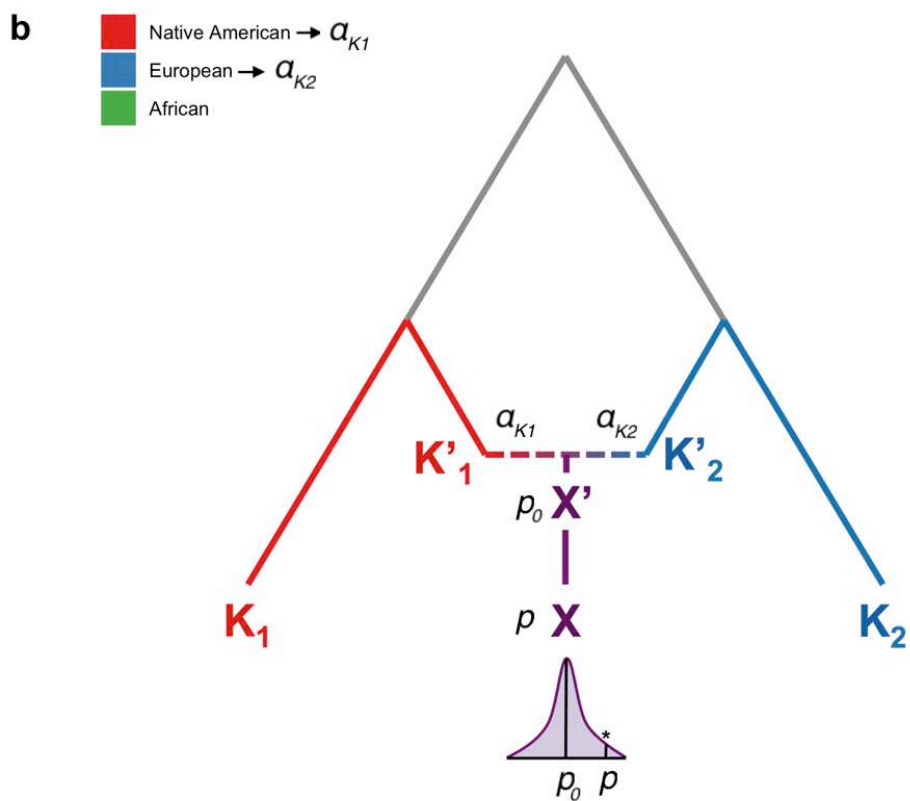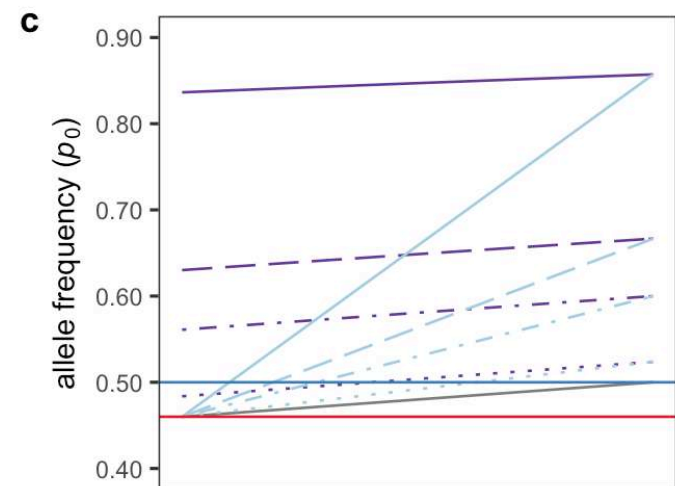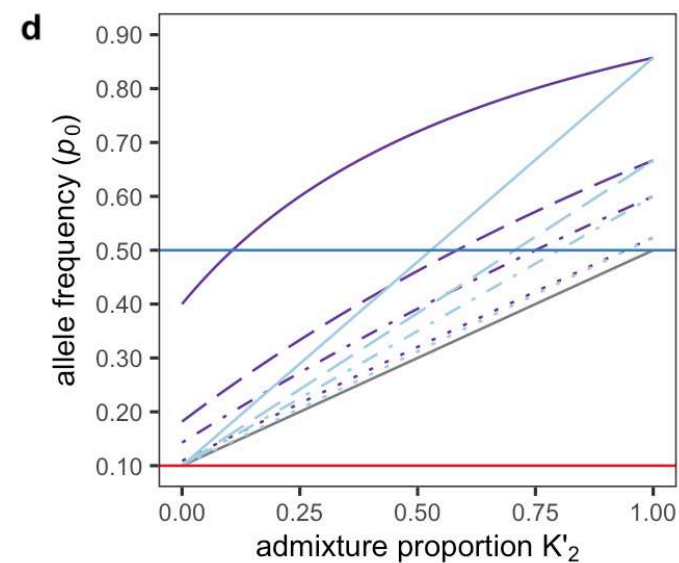

Model

- Neutral
- ⋯ Post-admixture ( $s=0.1$ )
- - Post-admixture ( $s=0.5$ )
- · Post-admixture ( $s=1$ )
- Post-admixture ( $s=5$ )
- ⋯ Selection in  $K'_2/K_2$  ( $s=0.1$ )
- - Selection in  $K'_2/K_2$  ( $s=0.5$ )
- · Selection in  $K'_2/K_2$  ( $s=1$ )
- Selection in  $K'_2/K_2$  ( $s=5$ )

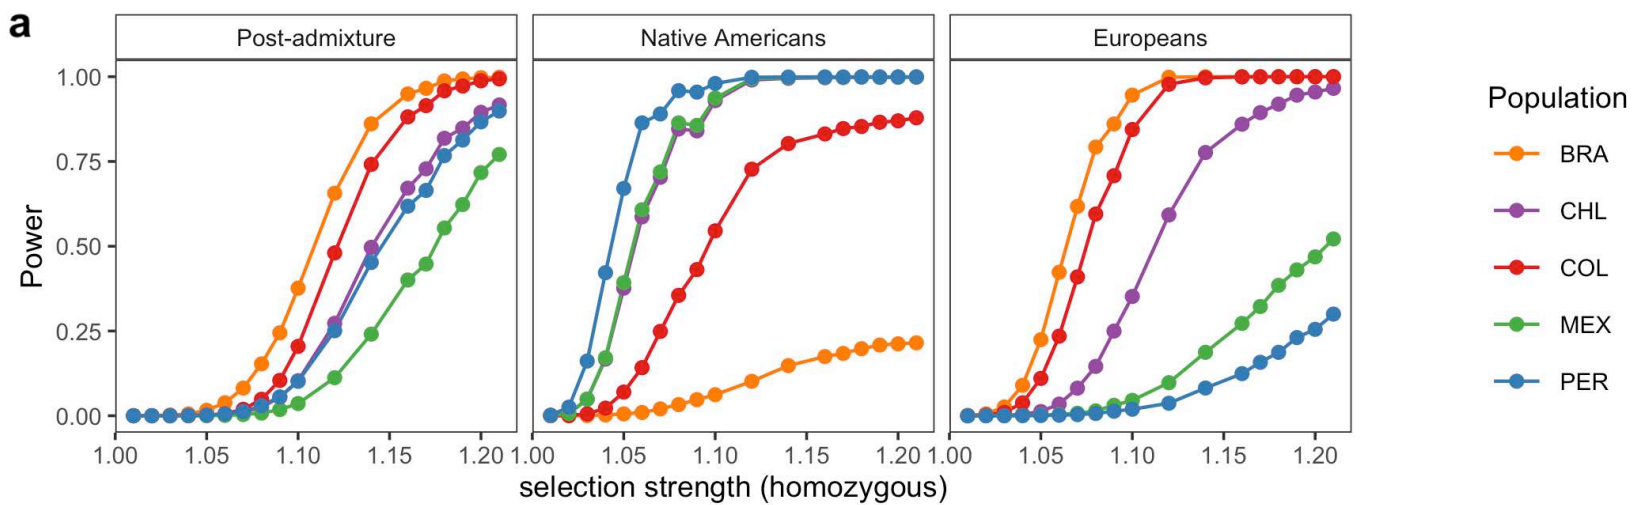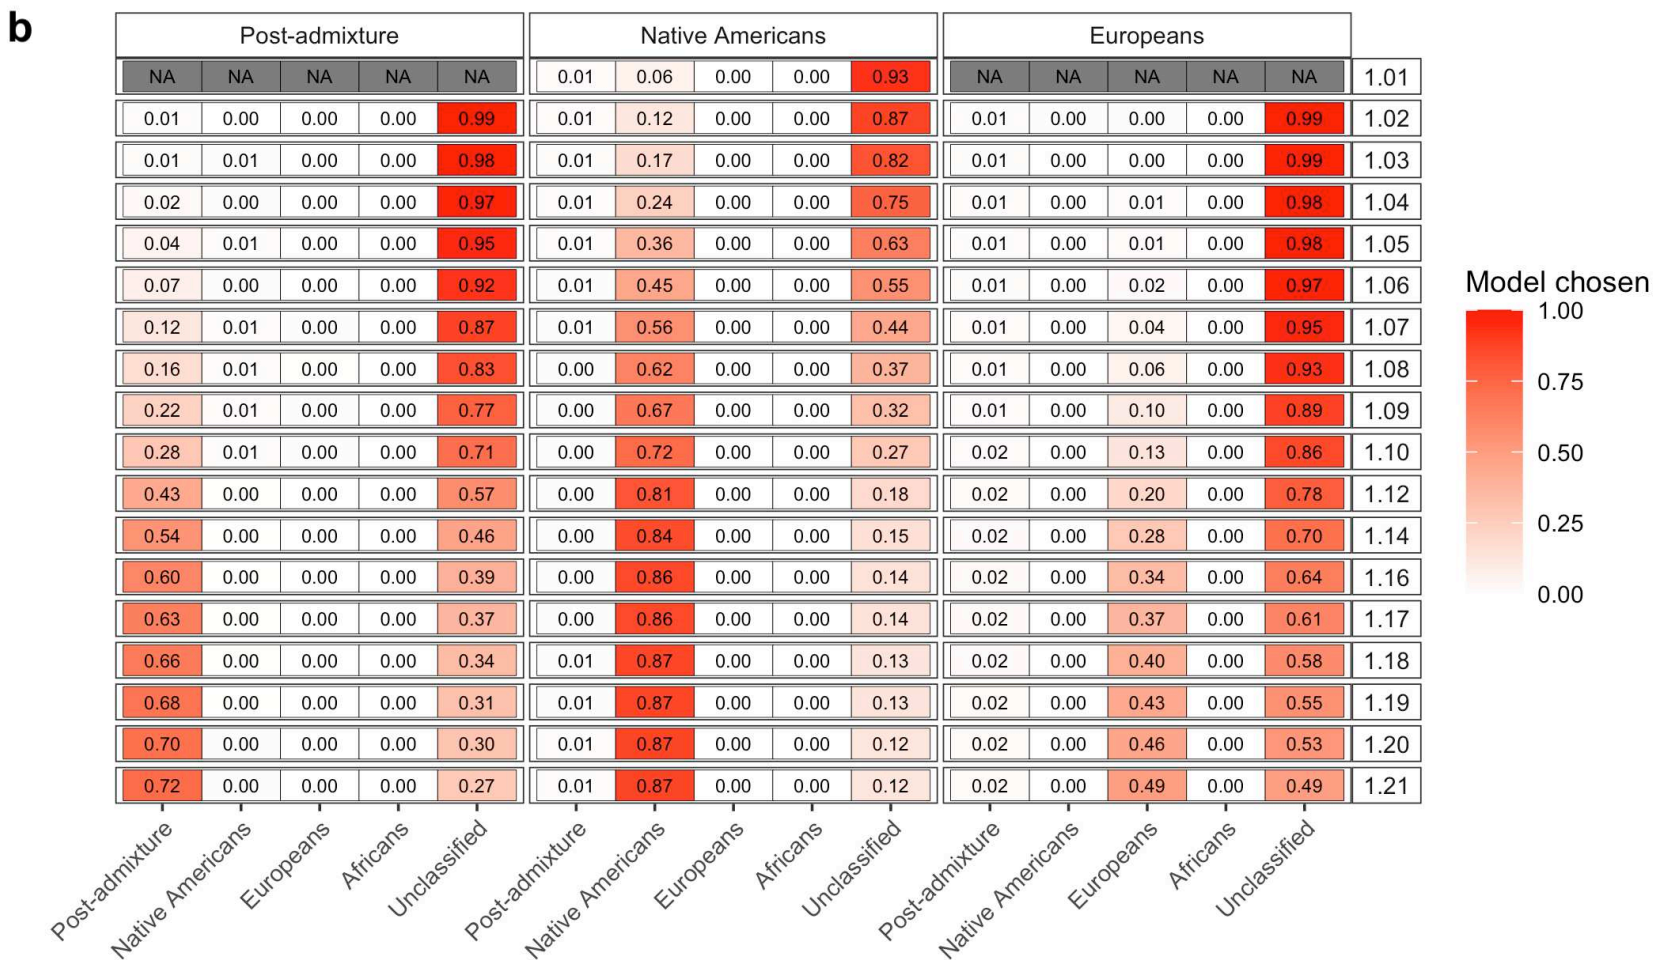

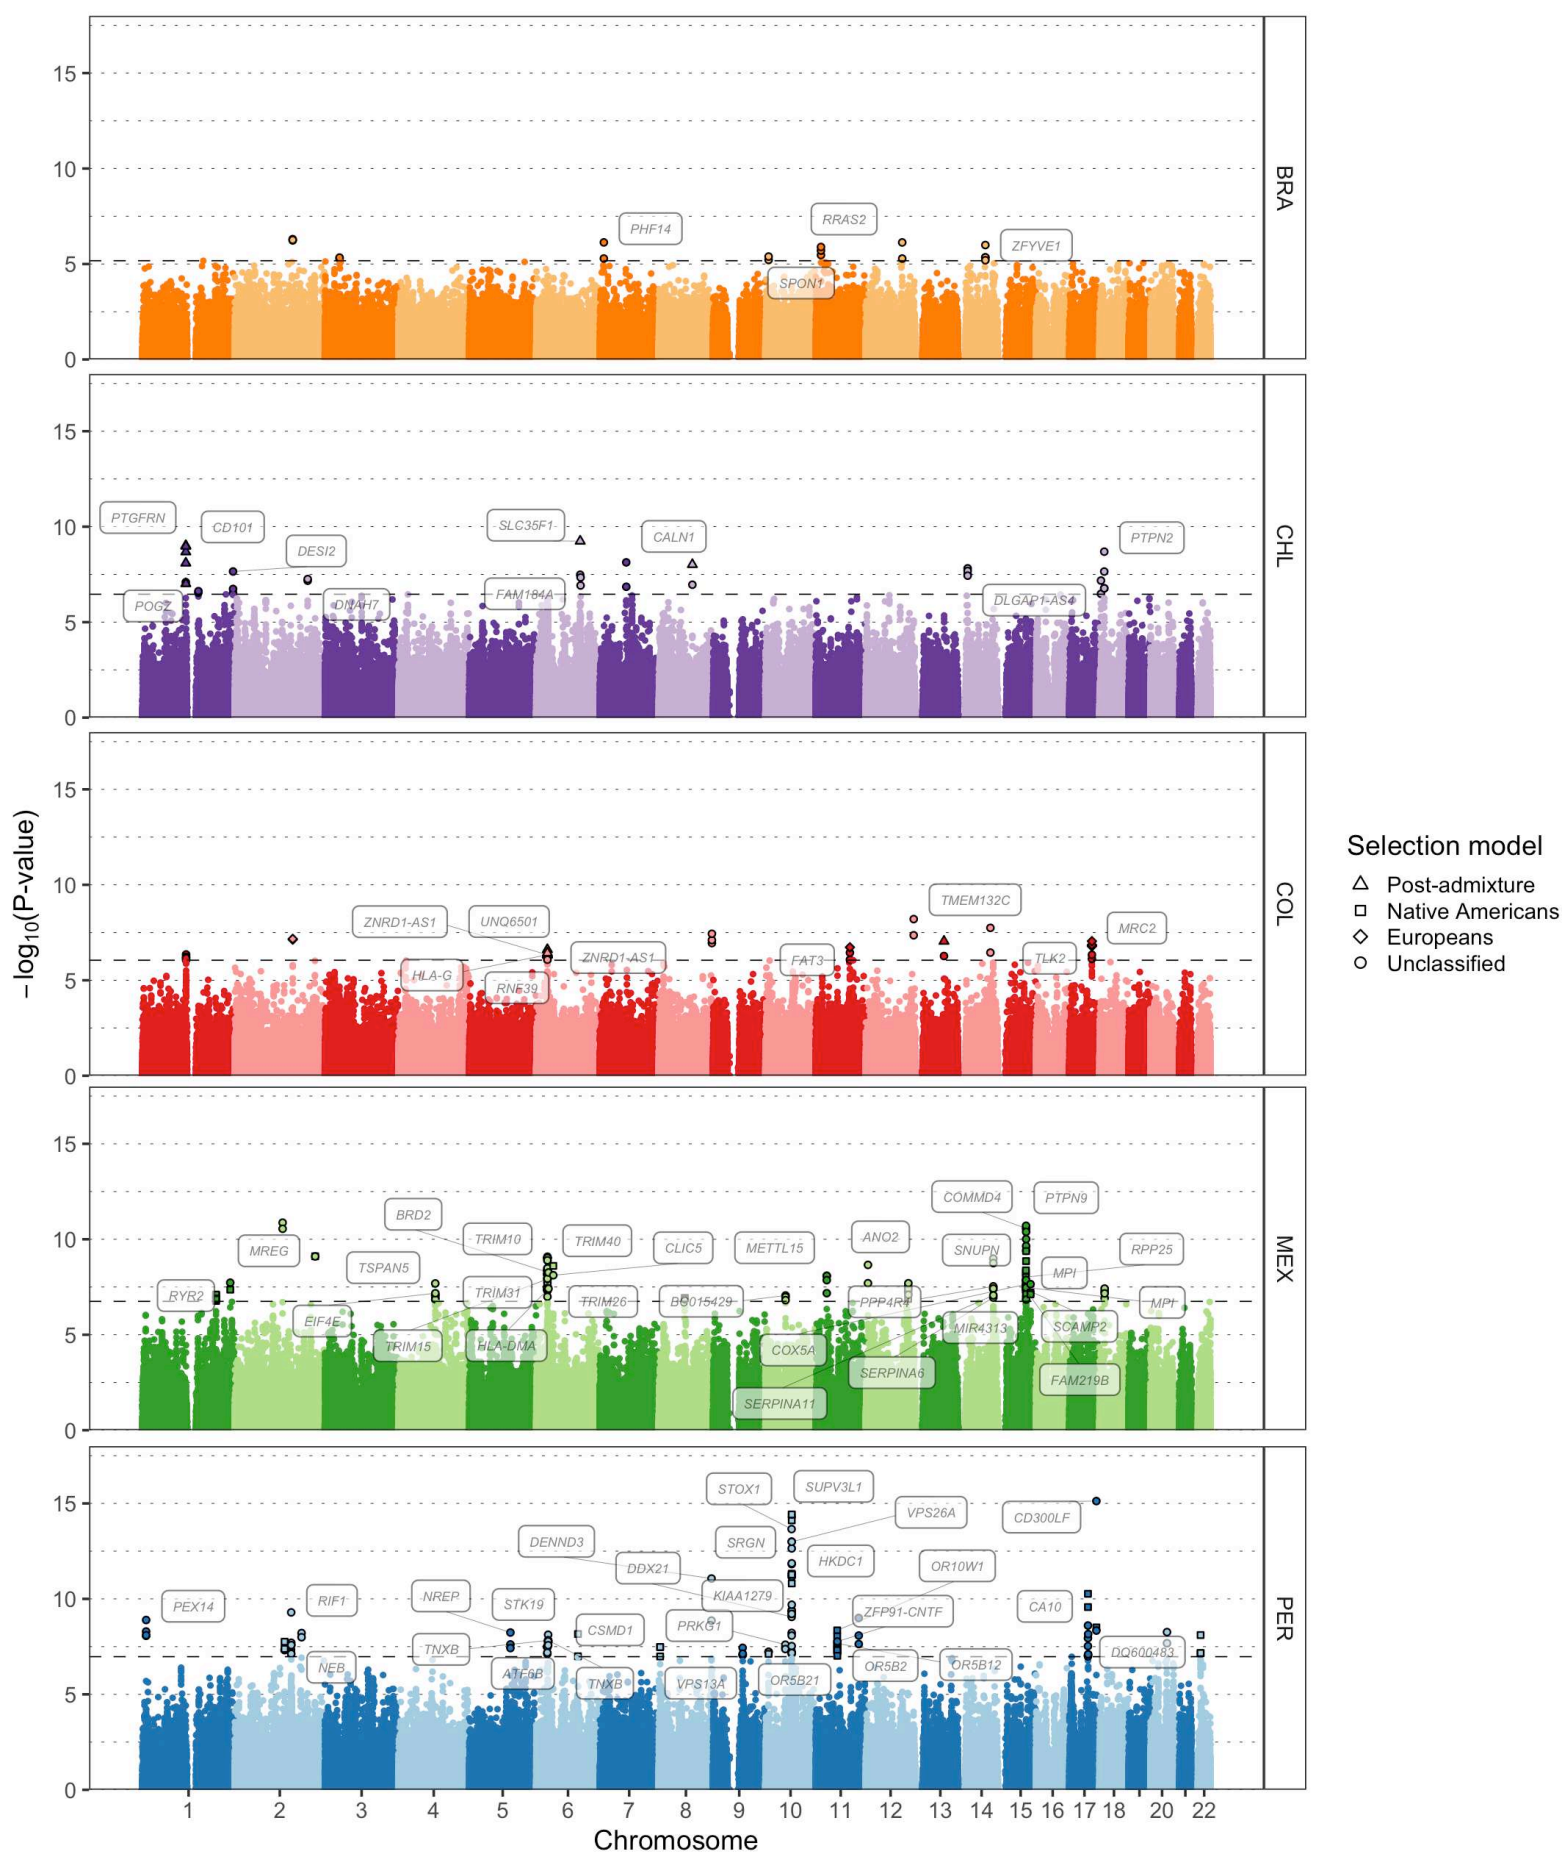

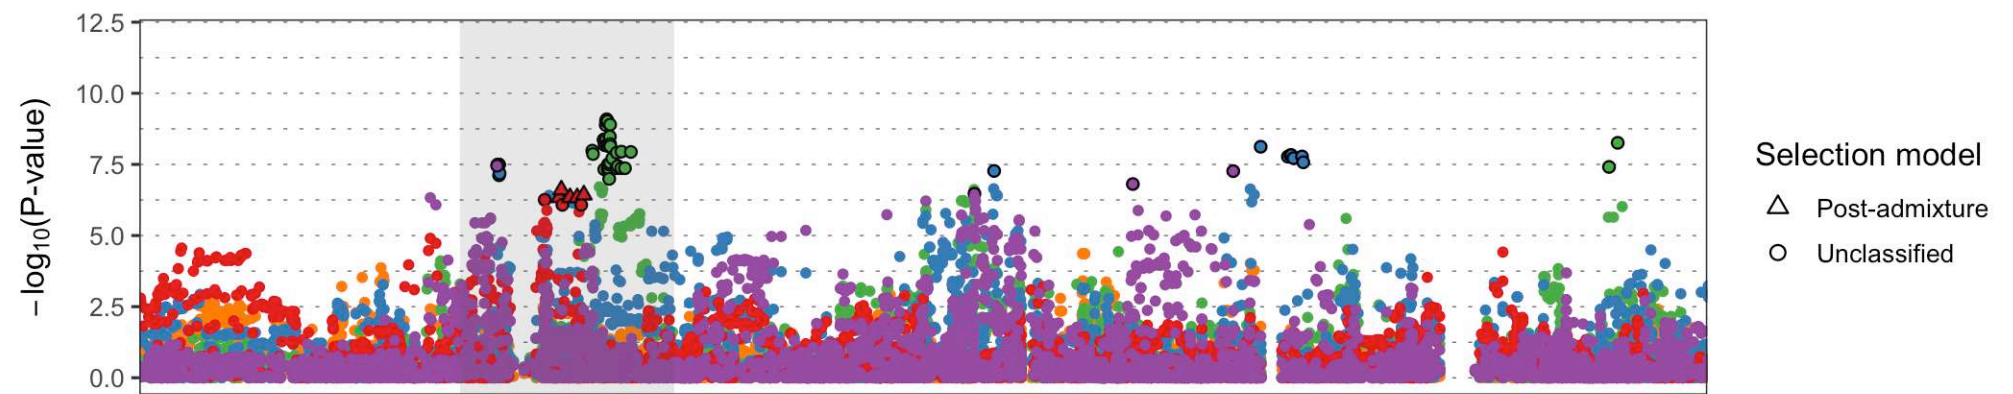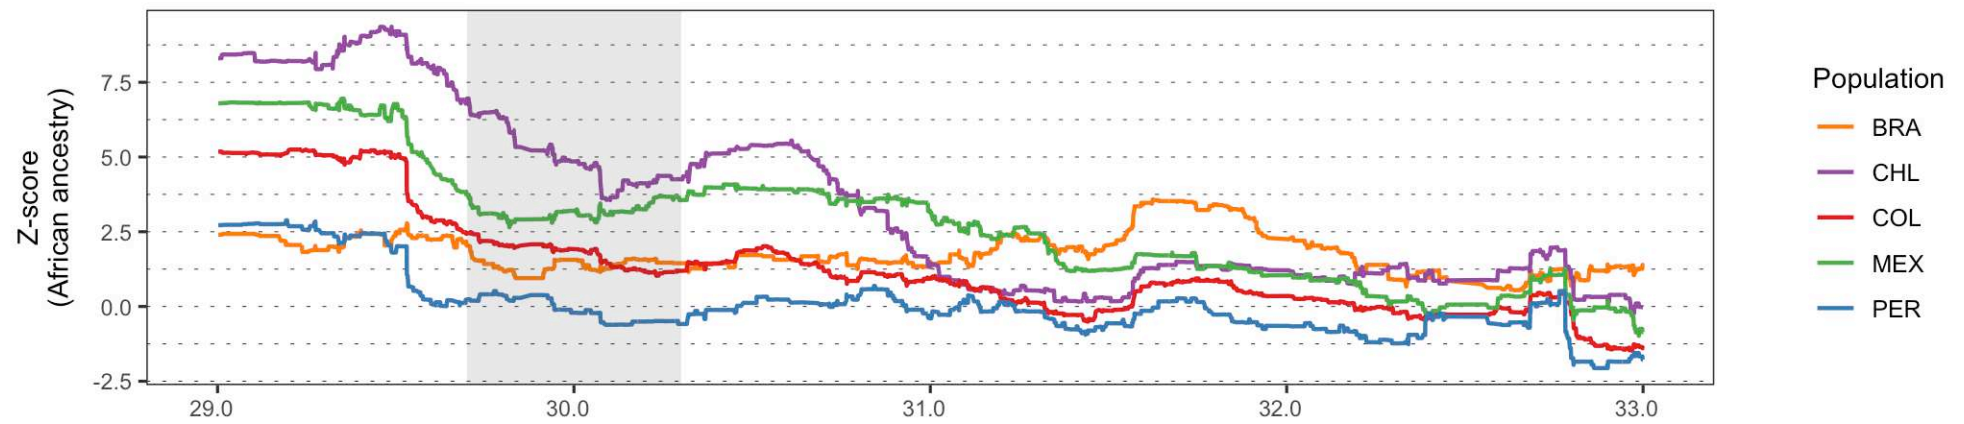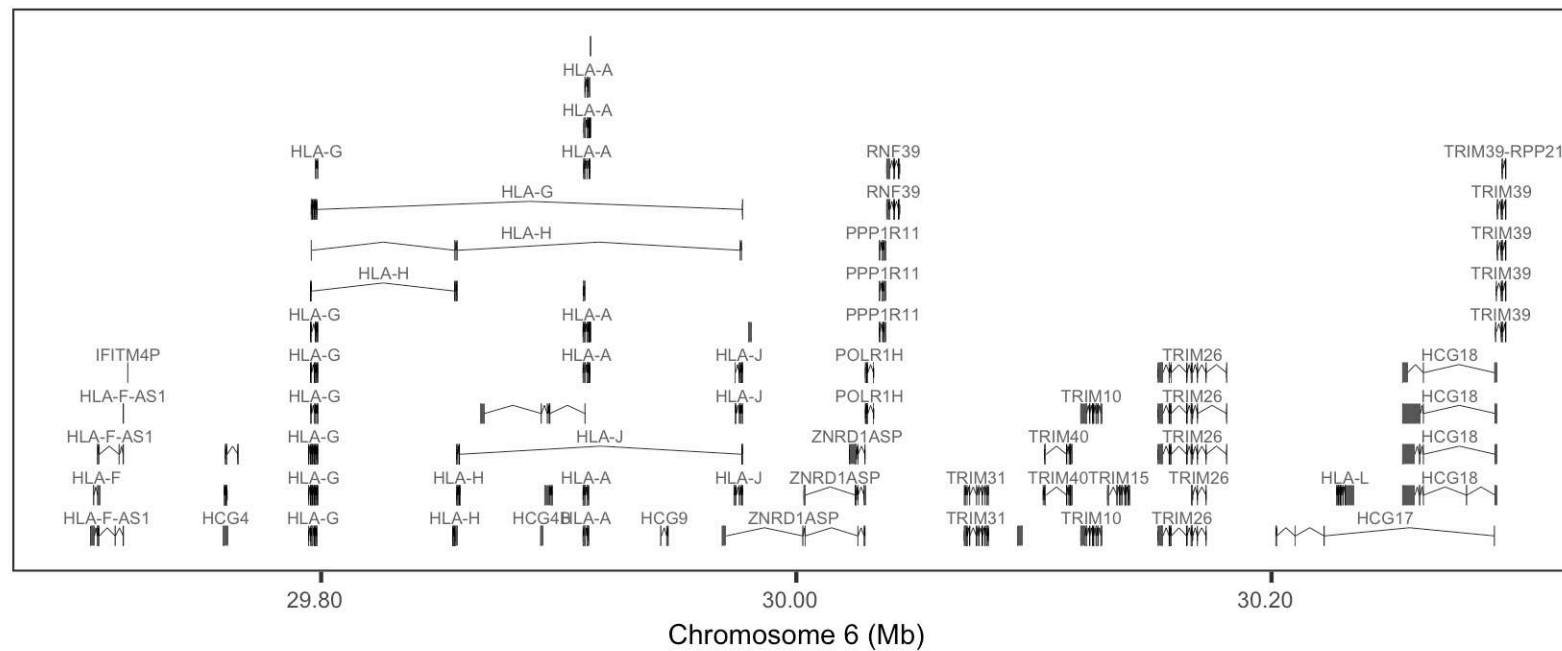

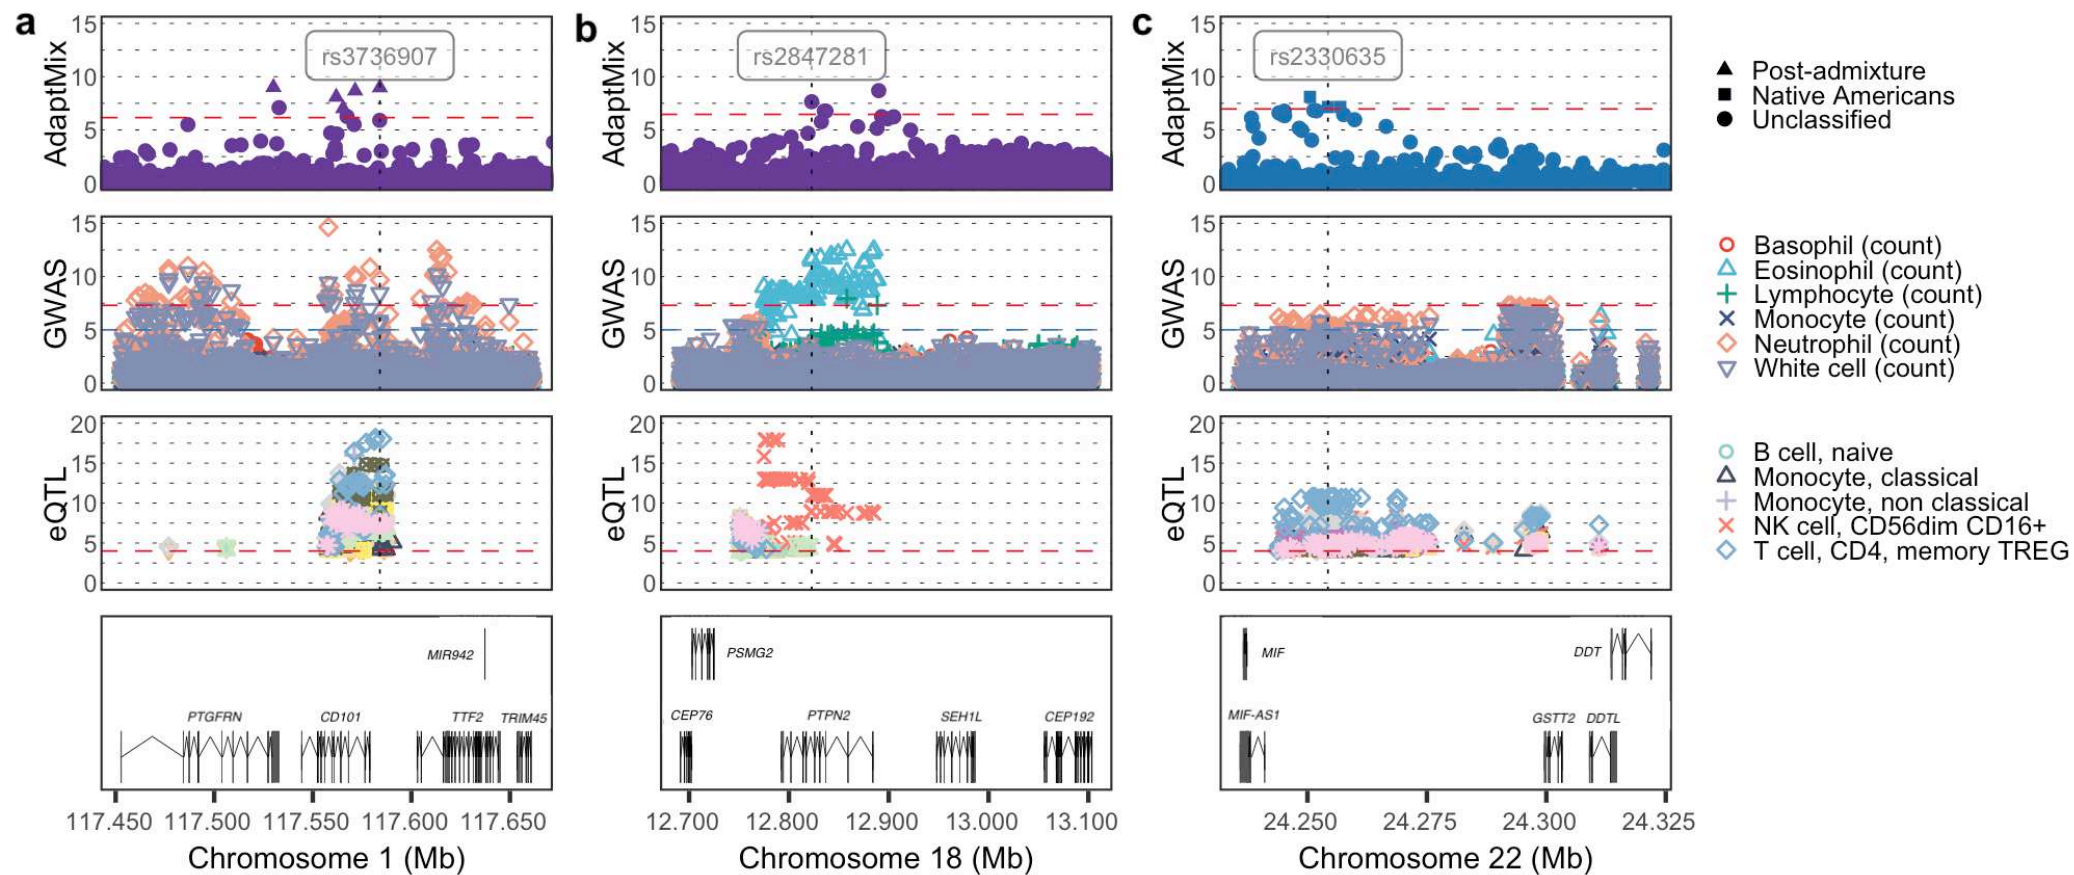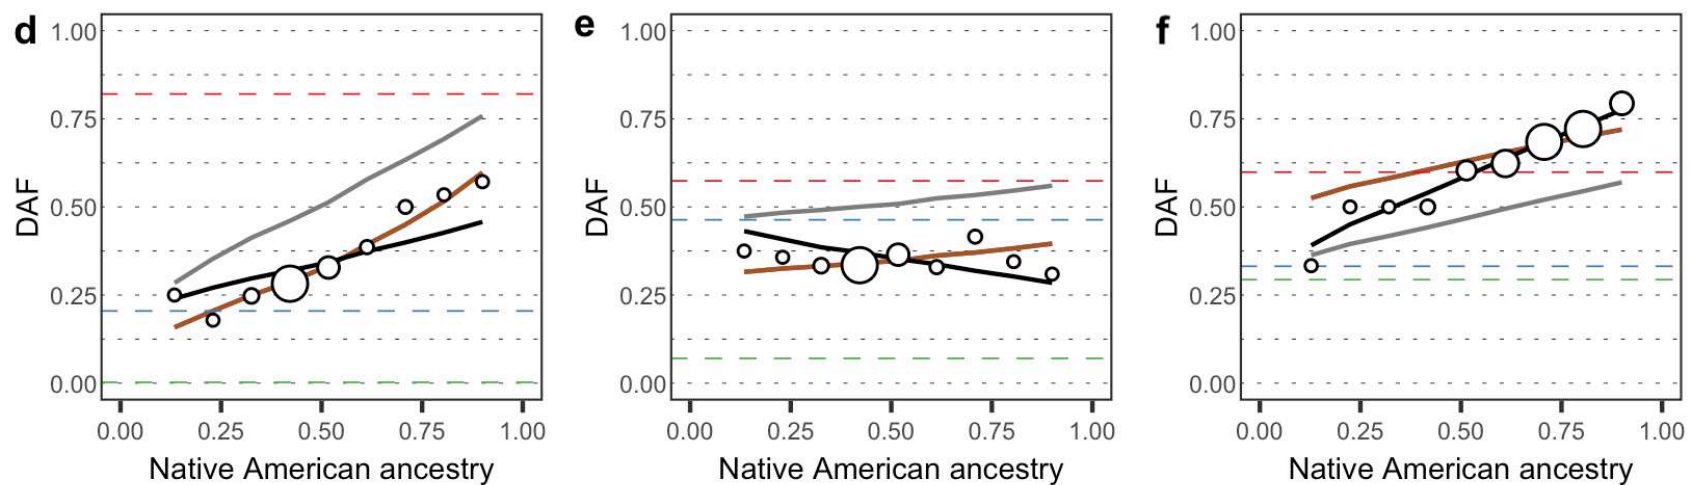

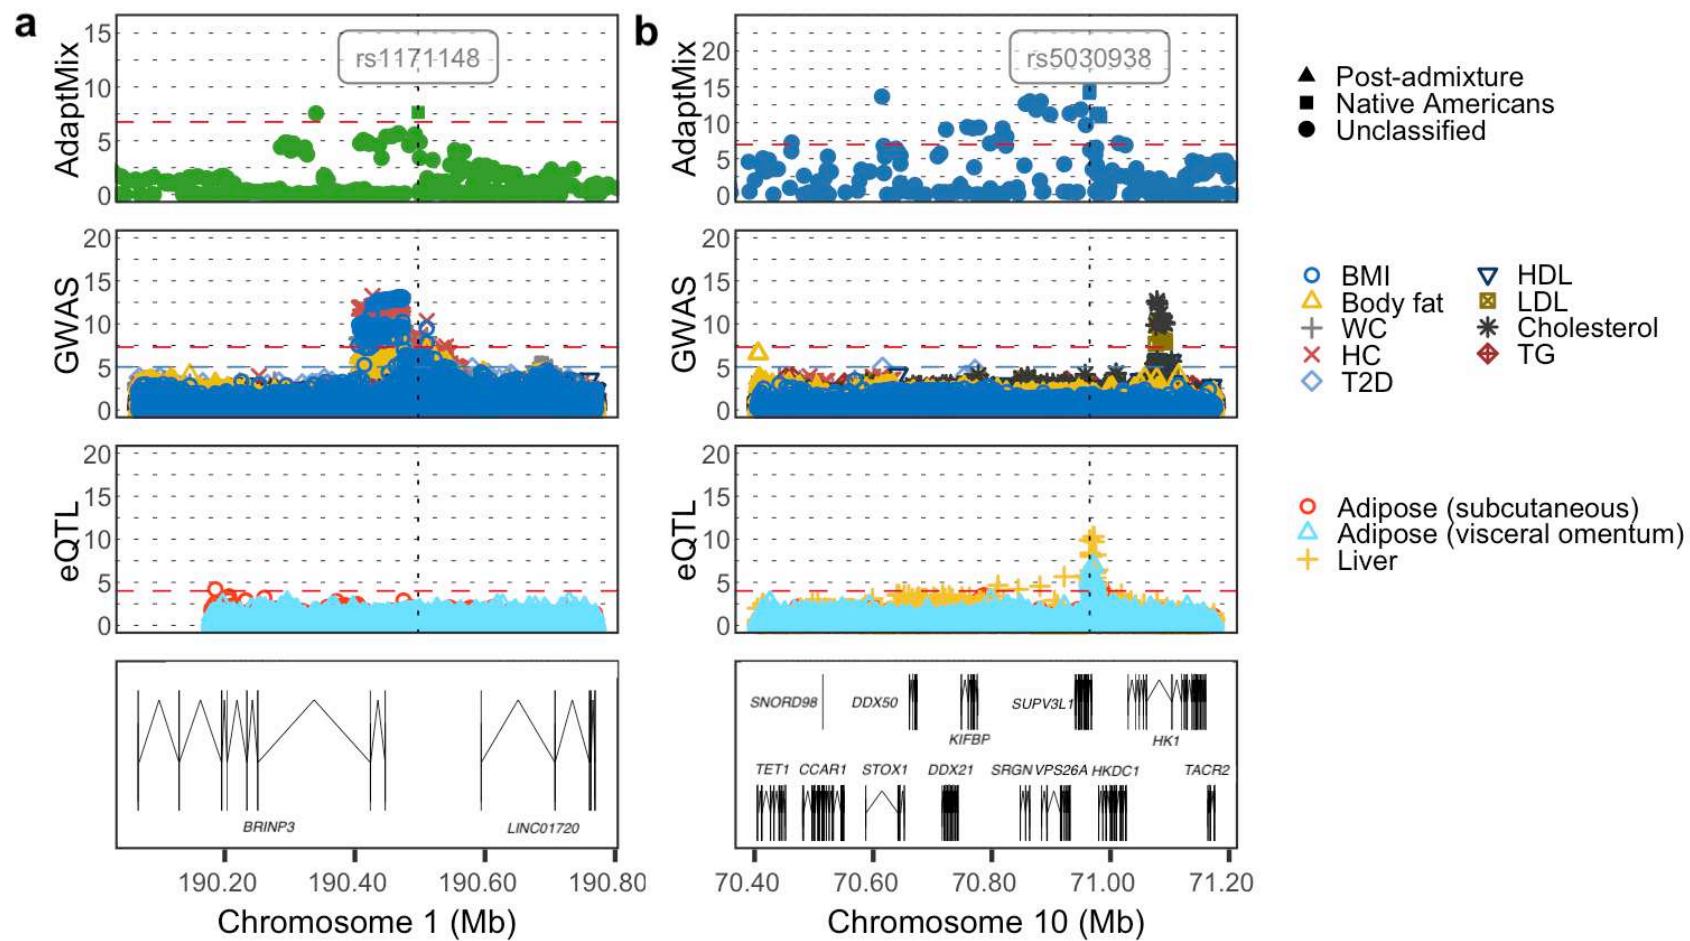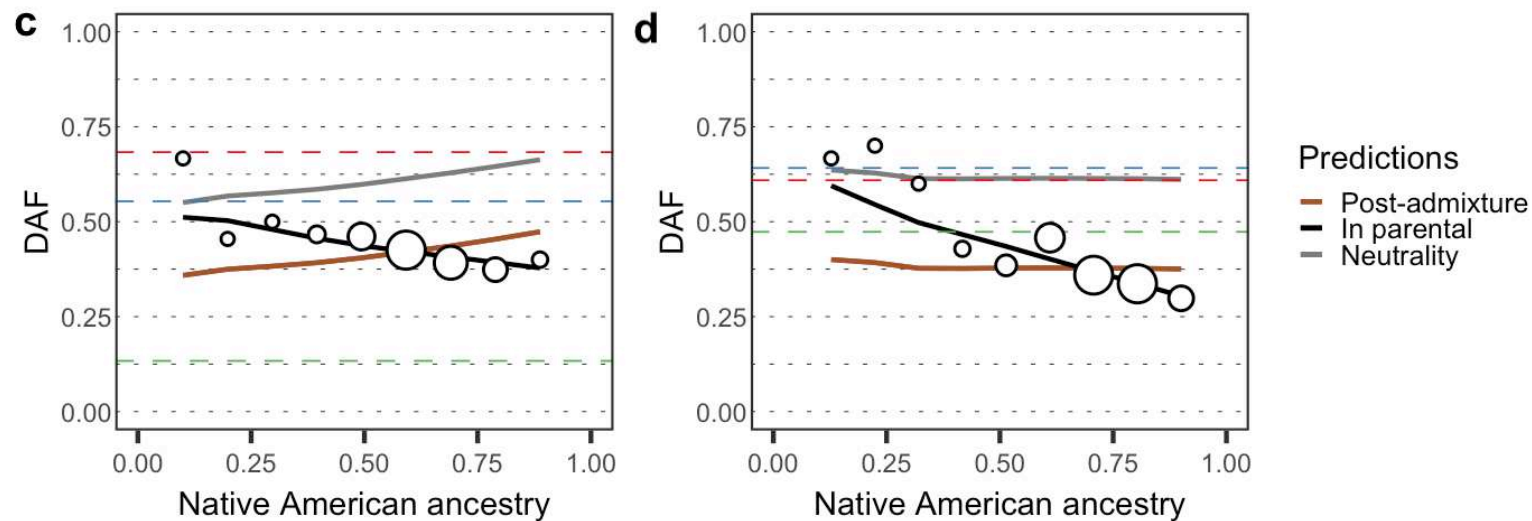

Source: https://www.biorxiv.org/content/10.1101/2021.11.15.467418v1.full.pdf
